# Supplementary material
Source: PubMed Central journal article supplement (PMC8575955)
Supplement: 41416_2021_1545_MOESM2_ESM.pdf [file 41416_2021_1545_MOESM2_ESM.pdf]

## Supplementary Methods

### DNA isolation

DNA for 4 of the 8 samples used was identical to that sent to TCGA, while the remaining 4 samples consisted of DNA newly extracted from a section of tumor adjacent to that used for TCGA extraction.

### HPV16-human hybrid capture, library preparation, and PacBio long-read sequencing

We subjected HPV-enriched tumor DNA from 8 samples to PacBio long-read sequencing. All 8 samples are represented in TCGA CESC cohort. Of note, TCGA Illumina data suggested integrations involving both HPV16 and HPV70 in 1 sample (TCGA-C5-A2LT). PacBio data analysis of TCGA-C5-A2LT confirmed 1 site involving HPV70 in the *E2* gene region, which shares ~70% homology to HPV16. The 8 samples were spread across 4 sequencing runs.

SMRTbell® libraries for sequencing on the PacBio Sequel® System were constructed as outlined in the PacBio Procedure & Checklist – Multiplexed Genomic DNA Target Capture Using IDT xGen® Lockdown® Probes (available at: <https://www.pacb.com/documentation/procedure-checklist-multiplex-genomic-dna-target-capture-using-idt-xgen-lockdown-probes/>). Briefly, gDNA (2 µg) was sheared to ~6-10 Kb fragments by g-TUBE (Covaris; USA) centrifugation. Sheared gDNA was concentrated using AMPure PB beads (Pacific Biosciences; USA), end-repaired and A-tailed, and ligated with barcoded adapters. After another AMPure bead purification, samples were PCR-amplified using the PacBio universal primer. PCR-amplified samples were size selected using the BluePippin system and pooled for hybridization with custom xGen® Lockdown® probes (Integrated DNA Technologies; USA) designed against the HPV16 genomic sequence. Hybridized DNA fragments were bead-captured and PCR-amplified, followed by DNA damage and end repair steps. Libraries were purified preceding the primer annealing/polymerase binding steps. At time points specified in the PacBio protocol referenced above, sample/library size and concentration were assessed using the Fragment Analyzer (Agilent; USA).

### Identification and prioritization of candidate IDGs

*Survival association analysis.* Using the maximally selected rank statistics, we first determined a cutoff point value for each candidate IDG corresponding to the most significant Logrank test statistics. We then converted the candidate IDG's expression to dichotomous variable, high vs. low, based on the cutoff point. This was done separately for each candidate IDG.

### Functional testing of candidate IDGs

*Western blotting.* Cells ( $3.6 \times 10^6$ ) cells were washed with 1X PBS and lysed for 10 min on ice using Cell Extraction Buffer (Life Technologies) supplemented with 1 mM PMSF (Sigma; St. Louis, MO) and a Protease Inhibitor Cocktail (Sigma). Undigested cellular debris was pelleted by centrifugation at 10,000 RPM and protein was quantified by Bradford Assay (Sigma). Cell lysate (20 µg) was run on a Criterion Tris-HCl polyacrylamide gel (Bio-Rad), transferred to PVDF membranes, blocked with 1X TBS + 10% nonfat dry milk at room temperature for 1 h, and incubated with primary antibody overnight at 4°C. The following day, membranes were washed, incubated for 1 h at room temperature with HRP-conjugated goat anti-rabbit or mouse anti-rabbit IgG (Cell Signaling Technology; Danvers, MA), and developed using Pierce™ ECL western blotting substrate (Thermo Scientific).

|                   | <b>PacBio<br/>Subjects</b> | <b>MCW-ICC cohort for<br/>survival analysis</b> |
|-------------------|----------------------------|-------------------------------------------------|
| <b>Total</b>      | 8                          | 145                                             |
| <b>Race</b>       |                            |                                                 |
| White             | 6                          | 112                                             |
| Black             | 2                          | 30                                              |
| Asian             | 0                          | 3                                               |
| <b>Age</b>        |                            |                                                 |
| Mean age (y) ± SD | 41.8 ± 9.9                 | 47.8 ± 15.0                                     |
| <b>Stage</b>      |                            |                                                 |
| I                 | 7                          | 91                                              |
| II                | 1                          | 24                                              |
| III               | 0                          | 19                                              |
| IV                | 0                          | 11                                              |
| <b>Histology</b>  |                            |                                                 |
| Squamous cell     | 7                          | 108                                             |
| Adenocarcinoma    | 1                          | 33                                              |
| Neuroendocrine    | 0                          | 2                                               |
| Other/NA          | 0                          | 2                                               |

**Supplementary Table S1. Subject characteristics.** Clinical information on 8 ICC PacBio patients and MCW-ICC patients used for survival analysis.

| <b>GeneSolution siRNA (Qiagen)</b> |                       |                        |
|------------------------------------|-----------------------|------------------------|
| <b>Product Name</b>                | <b>Catalog Number</b> | <b>Target Sequence</b> |
| AllStars Negative Control          | 1027281               | CAGGGTATCGACGATTACAAA  |
| Hs_BNC1_6 (#1)                     | SI04281130            | CCCTGCCATCGTGAATCAGTA  |
| Hs_BNC1_7 (#2)                     | SI04302291            | AAGCATAAGTGCACCATCGAA  |
| Hs_RSBN1_6 (#1)                    | SI04229820            | ATGGGCCTATAATGTGGGTAA  |
| Hs_RSBN1_1 (#2)                    | SI00708519            | CCCAGTGGATATTTCAATTAA  |
| Hs_USP36_9 (#1)                    | SI05784954            | CTGCTACGTGAAGGCAAGCAA  |
| Hs_USP36_3 (#2)                    | SI00138082            | CAAGAGCGTCTCGGACACCTA  |
| Hs_TAOK3_4 (#1)                    | SI00115038            | AAGAGCGGATCTCCAAACATA  |
| Hs_TAOK3_5 (#2)                    | SI02224761            | CAAACAGTATAAAGCACTCAA  |

| <b>qRT-PCR primers (IDT)</b> |               |                            |
|------------------------------|---------------|----------------------------|
| <b>Gene Name</b>             | <b>Primer</b> | <b>Sequence (5' to 3')</b> |
| <i>BNC1</i>                  | Forward       | GCCTTGGACTGGGACTTC         |
|                              | Reverse       | GGTATGATGATGGATTGCTCTTC    |
| <i>RSBN1</i>                 | Forward       | ATGCCAAAGTCACCCCTCAA       |
|                              | Reverse       | CTTCAAAGAGAACTTCGCGG       |
| <i>USP36</i>                 | Forward       | CTGCACCAGGACCCACTTC        |
|                              | Reverse       | CGCTGTGTCTCCTGCTTTCT       |
| <i>TAOK3</i>                 | Forward       | GCCATTTTGGCAGAGCAGT        |
|                              | Reverse       | TCTTGAGCCTCATCTAGCCG       |
| <i>RPS18</i>                 | Forward       | TGTGGTGTGAGGAAAGCA         |
|                              | Reverse       | CTTCAGTCGCTCCAGGTCTT       |

**Supplementary Table S2. siRNA and qRT-PCR primer information.** Sequence information for negative control and candidate IDG-specific siRNAs used in functional assays (top) and qRT-PCR primers (bottom) used for knockdown validation and survival analysis.

| <b>MCW PacBio HPVseq</b> |                    |                   |
|--------------------------|--------------------|-------------------|
| <b>Sample</b>            | <b>Breakpoints</b> | <b>All Events</b> |
| <b>A2LX</b>              | 233                | 72                |
| <b>A1ML</b>              | 14                 | 5                 |
| <b>A3HD</b>              | 9                  | 3                 |
| <b>A0TN</b>              | 2                  | 2                 |
| <b>A2LV</b>              | 2                  | 1                 |
| <b>A8XH</b>              | 2                  | 1                 |
| <b>A1M9</b>              | 4                  | 2                 |
| <b>A2LT</b>              | 1                  | 1                 |
| <b>Total (n=8)</b>       |                    |                   |
|                          | <b>267</b>         | <b>87</b>         |
| <b>Mean/Tumor</b>        | 33.4               | 10.9              |
| <b>Median/Tumor</b>      | 3                  | 2                 |

**Supplementary Table S3. HPV integration breakpoints and events identified by PacBio long-read sequencing of HPV-enriched DNA from 8 ICC tumors.** Summary of chimeric breakpoints and integration events identified by PacBio long-read sequencing of each ICC sample.

| TCGA ID | Event # | HPV bp | HPV Gene | Human Chrom Band | Human bp         | Human Gene/Locus   | Gene Location | PacBio Read # | Validation  | Clonality (IAF) |
|---------|---------|--------|----------|------------------|------------------|--------------------|---------------|---------------|-------------|-----------------|
| C5-A2LX | 1       | 7271   | URR      | 2p11.2           | chr2:85,508,423  | TCF7L1             | Intron        | 52            | TCGA (RNA)  | *1.000          |
| C5-A2LX | 1       | 3077   | E2       |                  | chr2:85,567,980  | TGOLN2, RETSAT     | NA            | 15            |             | *0.875          |
| C5-A2LX | 2       | 1670   | E1       | 2q36.3           | chr2:227,065,855 | LOC646736, MIR5702 | NA            | 6             | TCGA (WGS*) | *1.000          |
| C5-A2LX | 2       | 1844   | E1       |                  | chr2:227,083,815 | LOC646736, MIR5702 | NA            | 72            |             | *0.737          |
| C5-A2LX | 2       | 5211   | L2       |                  | chr2:227,097,401 | LOC646736, MIR5702 | NA            | 18            |             | *1.000          |
| C5-A2LX | 2       | 2679   | E1       |                  | chr2:227,111,063 | LOC646736, MIR5702 | NA            | 14            |             | *0.552          |
| C5-A2LX | 2       | 2249   | E1       |                  | chr2:227,118,254 | LOC646736, MIR5702 | NA            | 87            |             | *0.647          |
| C5-A2LX | 2       | 6137   | L1       |                  | chr2:227,131,464 | LOC646736, MIR5702 | NA            | 165           |             | *0.855          |
| C5-A2LX | 2       | 2056   | E1       |                  | chr2:227,150,653 | LOC646736, MIR5702 | NA            | 142           |             | *0.804          |
| C5-A2LX | 2       | 3883   | E5       |                  | chr2:227,157,170 | LOC646736, MIR5702 | NA            | 25            |             | *0.697          |
| C5-A2LX | 3       | 1950   | E1       | 5p14.3           | chr5:19,126,360  | LINC02223, CDH18   | NA            | 4             | TCGA (WGS*) |                 |
| C5-A2LX | 3       | 1130   | E1       |                  | chr5:19,153,366  | LINC02223, CDH18   | NA            | 10            |             | *0.748          |
| C5-A2LX | 4       | 3901   | E5       | 8q24.3           | chr8:142,417,944 | PTP4A3             | Intron        | 3             | TCGA (WGS*) |                 |
| C5-A2LX | 4       | 2946   | E2       |                  | chr8:142,478,365 | MROH5              | Intron        | 2             |             | *0.778          |
| C5-A2LX | 4       | 1173   | E1       |                  | chr8:142,490,986 | MROH5              | Intron        | 65            |             | *0.638          |
| C5-A2LX | 5       | 6424   | L1       | 9p21.1           | chr9:28,599,877  | LINGO2             | Intron        | 5             | TCGA (WGS*) |                 |
| C5-A2LX | 5       | 4631   | L2       |                  | chr9:28,630,838  | LINGO2             | Intron        | 4             |             |                 |
| C5-A2LX | 5       | 3102   | E2       |                  | chr9:28,636,652  | LINGO2             | Intron        | 14            |             |                 |
| C5-A2LX | 5       | 5234   | L2       |                  | chr9:28,652,735  | LINGO2             | Intron        | 506           |             | *0.781          |
| C5-A2LX | 5       | 482    | E6       |                  | chr9:28,744,518  | LINGO2             | Intron        | 308           |             | *0.813          |
| C5-A2LX | 6       | 2111   | E1       | 12p13.31         | chr12:6,401,803  | CD9, PLEKHG6       | NA            | 12            | TCGA (WGS*) | *0.758          |
| C5-A2LX | 6       | 3463   | E2       |                  | chr12:6,429,067  | PLEKHG6            | Intron        | 35            |             | *0.789          |
| C5-A2LX | 6       | 477    | E6       |                  | chr12:6,431,340  | PLEKHG6            | Intron        | 10            |             |                 |
| C5-A2LX | 6       | 6262   | L1       |                  | chr12:6,434,810  | PLEKHG6            | Intron        | 9             |             | *0.892          |
| C5-A2LX | 6       | 1151   | E1       |                  | chr12:6,441,241  | TNFRSF1A           | Intron        | 15            |             | *0.75; 0.76     |
| C5-A2LX | 6       | 6540   | L1       |                  | chr12:6,441,633  | TNFRSF1A           | Intron        | 44            |             | *0.75; 0.76     |
| C5-A2LX | 6       | 2721   | E1       |                  | chr12:6,446,618  | TNFRSF1A           | Intron        | 8             |             | *1.000          |
| C5-A2LX | 6       | 7677   | URR      |                  | chr12:6,459,345  | SCNN1A             | Intron        | 125           |             | *0.791          |
| C5-A2LX | 6       | 4882   | L2       |                  | chr12:6,460,875  | SCNN1A             | Intron        | 72            |             | *0.826          |
| C5-A2LX | 6       | 7315   | URR      |                  | chr12:6,477,179  | SCNN1A             | Intron        | 13            |             |                 |
| C5-A2LX | 6       | 7567   | URR      |                  | chr12:6,484,899  | SCNN1A; LTBR       | Intron        | 17            |             | *0.778          |
| C5-A2LX | 6       | 4357   | L2       |                  | chr12:6,521,227  | LTBR, CD27-AS1     | NA            | 20            |             |                 |
| C5-A2LX | 6       | 4829   | L2       |                  | chr12:6,673,800  | NOP2               | Intron        | 19            |             |                 |

**Supplementary Table S4. Summary of viral integrations identified by PacBio long-read sequencing of HPV-enriched ICC tumor DNA.** Details of each unique, chimeric viral-human breakpoint identified by PacBio sequencing. For each breakpoint, we provide viral nucleotide and gene location, human chromosome band, human nucleotide and gene location, gene location (intron or exon), number of supporting PacBio reads, and clonality as quantified by integration allele fraction using sample matched TCGA data (IAF). \*TCGA low-pass WGS used to calculate IAF. \*\*TCGA WXS data used to calculate IAF. No value in IAF column = ViFi program did not detect viral integration within 500 bp of listed breakpoint coordinates.00

| TCGA ID | Event # | HPV bp | HPV Gene | Human Chrom Band | Human bp          | Human Gene/Locus  | Gene Location | PacBio Read # | Validation       | Clonality (IAF) |
|---------|---------|--------|----------|------------------|-------------------|-------------------|---------------|---------------|------------------|-----------------|
| C5-A2LX | 7       | 1308   | E1       | 12q24.23         | chr12:118,653,036 | TAOK3             | Intron        | 1             | TCGA (RNA, WGS*) | *0.792          |
| C5-A2LX | 7       | 2624   | E1       |                  | chr12:118,655,948 | TAOK3             | Intron        | 1             |                  | *0.828          |
| C5-A2LX | 8       | 807    | E7       | 13q12.3          | chr13:29,561,276  | SLC46A3, MTUS2    | NA            | 10            | TCGA (WGS*)      | *0.504          |
| C5-A2LX | 9       | 2615   | E1       | 15q11.2          | chr15:21,144,087  | NF1P2, MIR5701    | NA            | 208           | TCGA (WGS*)      | *0.763          |
| C5-A2LX | 9       | 7891   | URR      |                  | chr15:21,147,233  | LINC01193         | Intron        | 62            |                  |                 |
| C5-A2LX | 9       | 4166   | E5α, L2  |                  | chr15:21,161,125  | LINC01193         | Intron        | 46            |                  |                 |
| C5-A2LX | 10      | 2354   | E1       | 17q12            | chr17:37,862,099  | ERBB2             | Intron        | 4             | TCGA (WGS*)      | *0.836          |
| C5-A2LX | 10      | 5675   | L1       |                  | chr17:37,886,244  | MIEN1             | Intron        | 4             |                  |                 |
| C5-A2LX | 10      | 6430   | L1       |                  | chr17:37,919,422  | IKZF3             | Exon          | 3             |                  |                 |
| C5-A2LX | 10      | 2625   | E1       |                  | chr17:37,924,795  | IKZF3             | Intron        | 420           |                  |                 |
| C5-A2LX | 10      | 2455   | E1       |                  | chr17:37,930,352  | IKZF3             | Intron        | 7             |                  |                 |
| C5-A2LX | 10      | 7743   | URR      |                  | chr17:37,935,663  | IKZF3             | Intron        | 80            |                  |                 |
| C5-A2LX | 10      | 7367   | URR      |                  | chr17:37,938,497  | IKZF3             | Intron        | 39            |                  |                 |
| C5-A2LX | 10      | 4665   | L2       |                  | chr17:37,939,932  | IKZF3             | Intron        | 31            |                  |                 |
| C5-A2LX | 10      | 4665   | L2       |                  | chr17:37,940,009  | IKZF3             | Intron        | 208           |                  |                 |
| C5-A2LX | 10      | 3717   | E2       |                  | chr17:37,944,545  | IKZF3             | Exon          | 138           |                  |                 |
| C5-A2LX | 10      | 2290   | E1       |                  | chr17:37,948,393  | IKZF3             | Intron        | 26            |                  |                 |
| C5-A2LX | 10      | 1632   | E1       |                  | chr17:37,962,079  | IKZF3             | Intron        | 107           |                  |                 |
| C5-A2LX | 10      | 1729   | E1       |                  | chr17:37,979,632  | IKZF3             | Intron        | 4551          |                  |                 |
| C5-A2LX | 10      | 1404   | E1       |                  | chr17:37,985,275  | IKZF3             | Intron        | 25            |                  |                 |
| C5-A2LX | 10      | 5799   | L1       |                  | chr17:37,991,088  | IKZF3             | Intron        | 1809          |                  |                 |
| C5-A2LX | 10      | 4501   | L2       |                  | chr17:37,991,745  | IKZF3             | Intron        | 825           |                  |                 |
| C5-A2LX | 10      | 5421   | L2       |                  | chr17:38,005,402  | IKZF3             | Intron        | 19            |                  |                 |
| C5-A2LX | 10      | 7706   | URR      |                  | chr17:38,007,730  | IKZF3             | Intron        | 7             |                  |                 |
| C5-A2LX | 10      | 1681   | E1       |                  | chr17:38,010,968  | IKZF3             | Intron        | 274           |                  |                 |
| C5-A2LX | 10      | 4602   | L2       |                  | chr17:38,045,349  | ZPBP2, GSDMB      | NA            | 27            |                  |                 |
| C5-A2LX | 11      | 547    | E7       | 17q21.31         | chr17:42,893,220  | GJC1              | Intron        | 14            | TCGA (WGS*)      | *0.500          |
| C5-A2LX | 11      | 1918   | E1       |                  | chr17:42,952,175  | EFTUD2            | Intron        | 17            |                  | *0.875          |
| C5-A2LX | 11      | 3159   | E2       |                  | chr17:43,153,784  | NMT1              | Intron        | 10            |                  | *0.082          |
| C5-A2LX | 11      | 2615   | E1       |                  | chr17:43,164,283  | NMT1              | Intron        | 12            |                  | *0.292          |
| C5-A2LX | 11      | 7058   | L1       |                  | chr17:43,173,794  | NMT1              | Intron        | 59            |                  | *0.707          |
| C5-A2LX | 11      | 295    | E6       |                  | chr17:43,182,811  | NMT1              | Intron        | 12            |                  |                 |
| C5-A2LX | 11      | 5647   | L1       |                  | chr17:43,202,273  | PLCD3             | Intron        | 69            |                  |                 |
| C5-A2LX | 11      | 6014   | L1       |                  | chr17:43,202,277  | PLCD3             | Intron        | 149           |                  |                 |
| C5-A2LX | 11      | 6320   | L1       |                  | chr17:43,206,277  | PLCD3             | Intron        | 33            |                  | *0.722          |
| C5-A2LX | 11      | 261    | E6       |                  | chr17:43,230,898  | HEXIM1, HEXIM2    | NA            | 13            |                  | *0.828          |
| C5-A2LX | 11      | 7849   | URR      |                  | chr17:43,412,179  | MAP3K14, ARHGAP27 | NA            | 106           |                  | *0.805          |

**Supplementary Table S4 (continued). Summary of viral integrations identified by PacBio long-read sequencing of HPV-enriched ICC tumor DNA.** Details of each unique, chimeric viral-human breakpoint identified by PacBio sequencing. For each breakpoint, we provide viral nucleotide and gene location, human chromosome band, human nucleotide and gene location, gene location (intron or exon), number of supporting PacBio reads, and clonality as quantified by integration allele fraction using sample matched TCGA data (IAF). \*TCGA low-pass WGS used to calculate IAF. \*\*TCGA WXS data used to calculate IAF. No value in IAF column = ViFi program did not detect viral integration within 500 bp of listed breakpoint coordinates.00

| TCGA ID | Event # | HPV bp | HPV Gene | Human Chrom Band | Human bp         | Human Gene/Locus           | Gene Location | PacBio Read # | Validation       | Clonality (IAF) |
|---------|---------|--------|----------|------------------|------------------|----------------------------|---------------|---------------|------------------|-----------------|
| C5-A2LX | 12      | 1185   | E1       | 19p13.3          | chr19:1,259,498  | MIDN, CIRBP-AS1            | NA            | 5             | TCGA (RNA, WGS*) | *0.93; 0.73     |
| C5-A2LX | 12      | 2635   | E1       |                  | chr19:1,261,480  | MIDN, CIRBP-AS1            | NA            | 5             |                  | *0.793          |
| C5-A2LX | 12      | 1911   | E1       |                  | chr19:1,263,855  | MIDN, CIRBP-AS1            | NA            | 7             |                  |                 |
| C5-A2LX | 13      | 1824   | E1       | 22q13.33         | chr22:50,894,323 | SBF1                       | Intron        | 1             | TCGA (RNA)       | *0.222          |
| C5-A2LX | 14      | 831    | E7       | 1p36.33          | chr1:2,261,091   | MORN1                      | Intron        | 6             | PacBio Only      |                 |
| C5-A2LX | 14      | 7341   | URR      |                  | chr1:2,297,772   | MORN1                      | Intron        | 26            |                  |                 |
| C5-A2LX | 14      | 1493   | E1       |                  | chr1:2,298,615   | MORN1                      | Intron        | 41            |                  | *1.000          |
| C5-A2LX | 14      | 1493   | E1       |                  | chr1:2,298,698   | MORN1                      | Intron        | 18            |                  | *1.000          |
| C5-A2LX | 15      | 3422   | E2       | 1p31.2           | chr1:69,303,092  | DEPDC1-AS1, LINC01707      | NA            | 16            | PacBio Only      | *0.750          |
| C5-A2LX | 15      | 1387   | E1       |                  | chr1:69,303,105  | DEPDC1-AS1, LINC01707      | NA            | 12            |                  | *0.750          |
| C5-A2LX | 16      | 6004   | L1       | 1q21.3           | chr1:154,995,068 | DCST2                      | Intron        | 5             | PacBio Only      | *0.667          |
| C5-A2LX | 16      | 2615   | E1       | 1q21.3           | chr1:155,067,370 | EFNA3, EFNA1               | NA            | 6             | PacBio Only      |                 |
| C5-A2LX | 16      | 18     | URR      |                  | chr1:155,084,125 | EFNA3, EFNA1               | NA            | 7             |                  |                 |
| C5-A2LX | 16      | 6679   | L1       |                  | chr1:155,084,503 | EFNA3, EFNA1               | NA            | 10            |                  |                 |
| C5-A2LX | 17      | 4943   | L2       | 1q25.1           | chr1:173,911,868 | RC3H1                      | Intron        | 13            | PacBio Only      |                 |
| C5-A2LX | 17      | 2813   | E2       |                  | chr1:173,921,675 | RC3H1                      | Intron        | 14            |                  | *1.000          |
| C5-A2LX | 18      | 6709   | L1       | 2p21             | chr2:47,060,411  | LINC01119                  | Intron        | 22            | PacBio Only      |                 |
| C5-A2LX | 18      | 3547   | E2       |                  | chr2:47,077,935  | LINC01119                  | Intron        | 7             |                  |                 |
| C5-A2LX | 19      | 218    | E6       | 2p12             | chr2:76,106,944  | GCFC2, LRRTM4              | NA            | 29            | PacBio Only      |                 |
| C5-A2LX | 19      | 2044   | E1       |                  | chr2:76,106,920  | GCFC2, LRRTM4              | NA            | 7             |                  |                 |
| C5-A2LX | 20      | 2035   | E1       | 2p12             | chr2:78,323,777  | LOC101927967; LOC101927948 | Intron        | 9             | PacBio Only      |                 |
| C5-A2LX | 21      | 472    | E6       | 2q24.2           | chr2:161,564,397 | RBMS1, TANK                | NA            | 13            | PacBio Only      |                 |
| C5-A2LX | 22      | 3547   | E2       | 2q33.3           | chr2:205,183,112 | ICOS, PARD3B               | NA            | 4             | PacBio Only      |                 |
| C5-A2LX | 23      | 1727   | E1       | 4q12             | chr4:55,051,331  | GSX2, PDGFRA               | NA            | 118           | PacBio Only      |                 |
| C5-A2LX | 23      | 938    | E1       |                  | chr4:55,119,291  | PDGFRA                     | Intron        | 8             |                  |                 |
| C5-A2LX | 23      | 7160   | URR      |                  | chr4:55,171,192  | PDGFRA, LINC02283          | NA            | 5             |                  |                 |
| C5-A2LX | 23      | 2776   | E2       |                  | chr4:55,181,350  | PDGFRA, LINC02283          | NA            | 6             |                  |                 |
| C5-A2LX | 24      | 2041   | E1       | 4q13.2           | chr4:68,892,428  | TMPRSS11GP, TMPRSS11F      | NA            | 3             | PacBio Only      |                 |
| C5-A2LX | 24      | 4638   | L2       |                  | chr4:68,901,804  | TMPRSS11GP, TMPRSS11F      | NA            | 7             |                  |                 |
| C5-A2LX | 24      | 7077   | L1       |                  | chr4:68,913,681  | TMPRSS11GP, TMPRSS11F      | NA            | 87            |                  | *0.934          |
| C5-A2LX | 24      | 4051   | E5       |                  | chr4:68,967,947  | TMPRSS11F                  | Intron        | 20            |                  |                 |
| C5-A2LX | 24      | 214    | E6       |                  | chr4:68,970,894  | TMPRSS11F                  | Intron        | 8             |                  | *1.000          |
| C5-A2LX | 25      | 1233   | E1       | 4q21.22          | chr4:84,215,930  | HPSE                       | Exon          | 35            | PacBio Only      |                 |
| C5-A2LX | 25      | 6749   | L1       |                  | chr4:84,215,942  | HPSE                       | Exon          | 8             |                  |                 |

**Supplementary Table S4 (continued). Summary of viral integrations identified by PacBio long-read sequencing of HPV-enriched ICC tumor DNA.** Details of each unique, chimeric viral-human breakpoint identified by PacBio sequencing. For each breakpoint, we provide viral nucleotide and gene location, human chromosome band, human nucleotide and gene location, gene location (intron or exon), number of supporting PacBio reads, and clonality as quantified by integration allele fraction using sample matched TCGA data (IAF). \*TCGA low-pass WGS used to calculate IAF. \*\*TCGA WXS data used to calculate IAF. No value in IAF column = ViFi program did not detect viral integration within 500 bp of listed breakpoint coordinates.00

| TCGA ID | Event # | HPV bp | HPV Gene         | Human Chrom Band | Human bp         | Human Gene/Locus         | Gene Location | PacBio Read # | Validation  | Clonality (IAF) |        |
|---------|---------|--------|------------------|------------------|------------------|--------------------------|---------------|---------------|-------------|-----------------|--------|
| C5-A2LX | 26      | 7433   | URR              | 4q35.2           | chr4:187,516,526 | FAT1                     | Intron        | 3             | PacBio Only | *0.185          |        |
| C5-A2LX | 26      | 418    | E6               |                  | chr4:187,538,209 | FAT1                     | Exon          | 38            |             |                 |        |
| C5-A2LX | 27      | 7845   | URR              | 5p14.3           | chr5:21,162,007  | LINC02241, GUSBP1        | NA            | 4             | PacBio Only |                 |        |
| C5-A2LX | 28      | 7311   | URR              | 5p14.1           | chr5:26,464,862  | LINC02211, CDH9          | NA            | 5             | PacBio Only |                 |        |
| C5-A2LX | 29      | 6304   | L1               | 5p13.2           | chr5:37,843,222  | GDNF-AS1                 | Intron        | 4             | PacBio Only | *1.000          |        |
| C5-A2LX | 29      | 6618   | L1               |                  | chr5:37,850,856  | GDNF-AS1                 | Intron        | 9             |             |                 |        |
| C5-A2LX | 29      | 1173   | E1               |                  | chr5:37,879,116  | GDNF-AS1, LINC02110      | NA            | 26            |             |                 | *0.909 |
| C5-A2LX | 29      | 1384   | E1               |                  | chr5:37,879,119  | GDNF-AS1, LINC02110      | NA            | 54            |             |                 | *0.909 |
| C5-A2LX | 30      | 3744   | E2               | 5q33.3           | chr5:160,030,340 | ATP10B                   | Intron        | 8             | PacBio Only |                 |        |
| C5-A2LX | 30      | 4383   | L2               |                  | chr5:160,050,725 | ATP10B                   | Intron        | 39            |             |                 |        |
| C5-A2LX | 30      | 3581   | E2               |                  | chr5:160,058,398 | ATP10B                   | Intron        | 9             |             |                 |        |
| C5-A2LX | 30      | 1201   | E1               |                  | chr5:160,088,476 | ATP10B                   | Intron        | 24            |             |                 |        |
| C5-A2LX | 30      | 2008   | E1               |                  | chr5:160,088,556 | ATP10B                   | Intron        | 66            |             |                 |        |
| C5-A2LX | 30      | 1201   | E1               |                  | chr5:160,088,559 | ATP10B                   | Intron        | 103           |             |                 |        |
| C5-A2LX | 30      | 5697   | L1               |                  | chr5:160,146,649 | ATP10B                   | Intron        | 78            |             |                 |        |
| C5-A2LX | 31      | 3227   | E2               | 6q12             | chr6:67,226,455  | SLC25A51P1, LOC102723883 | NA            | 5             | PacBio Only | *0.866          |        |
| C5-A2LX | 31      | 372    | E6               |                  | chr6:67,226,486  | SLC25A51P1, LOC102723883 | NA            | 9             |             | *0.866          |        |
| C5-A2LX | 32      | 2043   | E1               | 6q26             | chr6:163,956,606 | QKI                      | NA            | 8             | PacBio Only |                 |        |
| C5-A2LX | 32      | 4141   | E5 $\alpha$ , L2 | 6q26             | chr6:163,956,674 | QKI                      | NA            | 4             |             |                 |        |
| C5-A2LX | 33      | 711    | E7               | 7p12.1           | chr7:53,110,436  | POM121L12, LINC01446     | NA            | 15            | PacBio Only | *0.867          |        |
| C5-A2LX | 34      | 6950   | L1               | 7q11.23          | chr7:72,214,534  | TYW1B                    | Intron        | 9             | PacBio Only |                 |        |
| C5-A2LX | 34      | 3754   | E2               |                  | chr7:72,231,432  | TYW1B                    | Intron        | 5             |             |                 |        |
| C5-A2LX | 34      | 1865   | E1               |                  | chr7:72,252,325  | TYW1B                    | Intron        | 12            |             |                 |        |
| C5-A2LX | 34      | 3528   | E2               |                  | chr7:72,254,760  | TYW1B                    | Intron        | 34            |             |                 |        |
| C5-A2LX | 35      | 656    | E7               | 8q22.2           | chr8:100,334,082 | VPS13B                   | Intron        | 4             | PacBio Only |                 |        |
| C5-A2LX | 36      | 5726   | L1               | 8q24.21          | chr8:128,703,146 | CASC8, CASC11            | NA            | 23            | PacBio Only | *1.000          |        |
| C5-A2LX | 36      | 6305   | L1               |                  | chr8:128,703,153 | CASC8, CASC11            | NA            | 4             |             |                 |        |
| C5-A2LX | 36      | 897    | E1               |                  | chr8:128,888,384 | PVT1                     | Intron        | 6             |             |                 |        |
| C5-A2LX | 37      | 4999   | L2               | 9p23             | chr9:9,166,889   | PTPRD                    | Intron        | 7             | PacBio Only |                 |        |
| C5-A2LX | 38      | 737    | E7               | 9q13             | chr9:66,774,182  | LOC728673, LOC101928381  | NA            | 114           | PacBio Only |                 |        |
| C5-A2LX | 38      | 4109   | E5 $\alpha$ , L2 |                  | chr9:66,774,368  | LOC728673, LOC101928381  | NA            | 48            |             |                 |        |
| C5-A2LX | 38      | 843    | E7               |                  | chr9:66,781,752  | LOC728673, LOC101928381  | NA            | 34            |             |                 |        |

**Supplementary Table S4 (continued). Summary of viral integrations identified by PacBio long-read sequencing of HPV-enriched ICC tumor DNA.** Details of each unique, chimeric viral-human breakpoint identified by PacBio sequencing. For each breakpoint, we provide viral nucleotide and gene location, human chromosome band, human nucleotide and gene location, gene location (intron or exon), number of supporting PacBio reads, and clonality as quantified by integration allele fraction using sample matched TCGA data (IAF). \*TCGA low-pass WGS used to calculate IAF. \*\*TCGA WXS data used to calculate IAF. No value in IAF column = ViFi program did not detect viral integration within 500 bp of listed breakpoint coordinates.00



| TCGA ID | Event # | HPV bp | HPV Gene         | Human Chrom Band | Human bp          | Human Gene/Locus     | Gene Location | PacBio Read # | Validation  | Clonality (IAF) |
|---------|---------|--------|------------------|------------------|-------------------|----------------------|---------------|---------------|-------------|-----------------|
| C5-A2LX | 39      | 7833   | URR              | 11q13.2          | chr11:66,753,233  | C11ORF86, SYT12      | NA            | 119           | PacBio Only |                 |
| C5-A2LX | 39      | 2105   | E1               |                  | chr11:66,758,636  | C11ORF86, SYT12      | NA            | 108           |             |                 |
| C5-A2LX | 39      | 7457   | URR              |                  | chr11:66,763,423  | C11ORF86, SYT12      | NA            | 13            |             |                 |
| C5-A2LX | 39      | 1313   | E1               |                  | chr11:66,766,216  | C11ORF86, SYT12      | NA            | 18            |             |                 |
| C5-A2LX | 39      | 1417   | E1               |                  | chr11:66,772,159  | C11ORF86, SYT12      | NA            | 9             |             |                 |
| C5-A2LX | 39      | 834    | E7               |                  | chr11:66,775,634  | C11ORF86, SYT12      | NA            | 14            |             |                 |
| C5-A2LX | 39      | 190    | E6               |                  | chr11:66,777,054  | C11ORF86, SYT12      | NA            | 7             |             |                 |
| C5-A2LX | 39      | 2512   | E1               |                  | chr11:66,850,202  | RHOD, LOC107984341   | NA            | 13            |             |                 |
| C5-A2LX | 39      | 2043   | E1               |                  | chr11:66,854,210  | RHOD, LOC107984341   | NA            | 17            |             |                 |
| C5-A2LX | 40      | 950    | E1               | 11q22.3          | chr11:103,453,269 | DYNC2H1, MIR4693     | NA            | 6             | PacBio Only |                 |
| C5-A2LX | 40      | 5589   | L2               |                  | chr11:103,521,980 | DYNC2H1, MIR4693     | NA            | 19            |             | *1.000          |
| C5-A2LX | 40      | 1490   | E1               |                  | chr11:103,526,657 | DYNC2H1, MIR4693     | NA            | 133           |             | *0.915          |
| C5-A2LX | 40      | 1869   | E1               |                  | chr11:103,535,176 | DYNC2H1, MIR4693     | NA            | 97            |             | *0.861          |
| C5-A2LX | 41      | 2236   | E1               | 12q12            | chr12:45,211,481  | NELL2                | Intron        | 6             | TCGA (RNA)  | *1.000          |
| C5-A2LX | 41      | 7462   | URR              |                  | chr12:45,229,727  | NELL2                | Intron        | 5             |             |                 |
| C5-A2LX | 42      | 597    | E7               | 12q24.22         | chr12:117,420,333 | FBXW8; LOC100506551  | Intron        | 9             | PacBio Only |                 |
| C5-A2LX | 43      | 6138   | L1               | 13q21.31         | chr13:63,365,463  | LINC00448            | Intron        | 4             | PacBio Only |                 |
| C5-A2LX | 44      | 390    | E6               | 13q21.31         | chr13:64,018,257  | LINC00376, LINC00395 | NA            | 6             | PacBio Only |                 |
| C5-A2LX | 44      | 6741   | L1               |                  | chr13:64,021,811  | LINC00376, LINC00395 | NA            | 5             |             |                 |
| C5-A2LX | 45      | 2693   | E1               | 13q21.31         | chr13:75,110,900  | LINC00381, LINC00347 | NA            | 6             | PacBio Only |                 |
| C5-A2LX | 46      | 4039   | E5               | 13q31.3          | chr13:92,408,791  | GPC5                 | Intron        | 4             | PacBio Only |                 |
| C5-A2LX | 47      | 7134   | URR              | 14q23.2          | chr14:64,556,051  | SYNE2                | Intron        | 5             | PacBio Only |                 |
| C5-A2LX | 48      | 607    | E7               | 14q24.1          | chr14:68,399,880  | RAD51B               | Intron        | 9             | PacBio Only |                 |
| C5-A2LX | 48      | 2648   | E1               |                  | chr14:68,419,000  | RAD51B               | Intron        | 8             |             |                 |
| C5-A2LX | 48      | 4183   | E5 $\alpha$ , L2 |                  | chr14:68,419,136  | RAD51B               | Intron        | 9             |             |                 |
| C5-A2LX | 48      | 6567   | L1               |                  | chr14:68,457,449  | RAD51B               | Intron        | 11            |             |                 |
| C5-A2LX | 48      | 1598   | E1               |                  | chr14:68,793,696  | RAD51B               | Intron        | 4             |             |                 |
| C5-A2LX | 48      | 2357   | E1               |                  | chr14:68,793,702  | RAD51B               | Intron        | 4             |             |                 |
| C5-A2LX | 49      | 1597   | E1               | 14q32.11         | chr14:91,473,610  | RPS6KA5              | Intron        | 2             | PacBio Only |                 |
| C5-A2LX | 49      | 5821   | L1               |                  | chr14:91,532,990  | DGLUCY               | Intron        | 177           |             |                 |
| C5-A2LX | 49      | 5317   | L2               |                  | chr14:91,536,079  | DGLUCY               | Intron        | 94            |             |                 |
| C5-A2LX | 49      | 7837   | URR              |                  | chr14:91,554,259  | DGLUCY               | Intron        | 52            |             |                 |
| C5-A2LX | 49      | 462    | E6               |                  | chr14:91,566,159  | DGLUCY               | Intron        | 170           |             |                 |
| C5-A2LX | 49      | 866    | E1               |                  | chr14:91,615,337  | DGLUCY               | Intron        | 5             |             |                 |

**Supplementary Table S4 (continued). Summary of viral integrations identified by PacBio long-read sequencing of HPV-enriched ICC tumor DNA.** Details of each unique, chimeric viral-human breakpoint identified by PacBio sequencing. For each breakpoint, we provide viral nucleotide and gene location, human chromosome band, human nucleotide and gene location, gene location (intron or exon), number of supporting PacBio reads, and clonality as quantified by integration allele fraction using sample matched TCGA data (IAF). \*TCGA low-pass WGS used to calculate IAF. \*\*TCGA WXS data used to calculate IAF. No value in IAF column = ViFi program did not detect viral integration within 500 bp of listed breakpoint coordinates.00

| TCGA ID | Event # | HPV bp | HPV Gene | Human Chrom Band | Human bp          | Human Gene/Locus     | Gene Location | PacBio Read # | Validation  | Clonality (IAF) |
|---------|---------|--------|----------|------------------|-------------------|----------------------|---------------|---------------|-------------|-----------------|
| C5-A2LX | 50      | 1761   | E1       | 14q32.32         | chr14:103,474,848 | CDC42BPB             | Exon          | 2             | PacBio Only |                 |
| C5-A2LX | 51      | 7472   | URR      | 15q14            | chr15:37,604,504  | MEIS2, TMC05A        | NA            | 136           | PacBio Only |                 |
| C5-A2LX | 52      | 1978   | E1       | 15q15.1          | chr15:41,522,299  | EXD1                 | Intron        | 389           | PacBio Only |                 |
| C5-A2LX | 53      | 1746   | E1       | 15q21.2          | chr15:52,104,676  | TMOD2                | Exon          | 26            | PacBio Only |                 |
| C5-A2LX | 53      | 7808   | URR      |                  | chr15:52,290,083  | LEO1, MAPK6-DT       | NA            | 7             |             |                 |
| C5-A2LX | 54      | 3447   | E2       | 16p13.3          | chr16:2,413,917   | ABCA17P              | Intron        | 34            | PacBio Only |                 |
| C5-A2LX | 54      | 787    | E7       |                  | chr16:2,429,030   | ABCA17P              | Intron        | 15            |             |                 |
| C5-A2LX | 54      | 4064   | E5       |                  | chr16:2,443,409   | ABCA17P              | Intron        | 46            |             |                 |
| C5-A2LX | 54      | 307    | E6       |                  | chr16:2,586,534   | MIR3178, PDPK1       | NA            | 274           |             |                 |
| C5-A2LX | 54      | 5531   | L2       |                  | chr16:2,589,133   | PDPK1                | Intron        | 10            |             |                 |
| C5-A2LX | 54      | 3665   | E2       |                  | chr16:2,596,518   | PDPK1                | Intron        | 23            |             |                 |
| C5-A2LX | 54      | 629    | E7       |                  | chr16:2,604,248   | PDPK1                | Intron        | 8             |             |                 |
| C5-A2LX | 55      | 1730   | E1       |                  | 16q21             | chr16:58,385,562     | PRSS54, GINS3 | NA            |             | 13              |
| C5-A2LX | 55      | 996    | E1       | chr16:58,385,729 |                   | PRSS54, GINS3        | NA            | 95            |             |                 |
| C5-A2LX | 55      | 3581   | E2       | chr16:58,387,057 |                   | PRSS54, GINS3        | NA            | 52            |             |                 |
| C5-A2LX | 55      | 3596   | E2       | chr16:58,456,442 |                   | GINS3, NDRG4         | NA            | 9             |             |                 |
| C5-A2LX | 55      | 3493   | E2       | chr16:58,476,739 |                   | GINS3, NDRG4         | NA            | 4             |             |                 |
| C5-A2LX | 56      | 1935   | E1       | 17q22            | chr17:52,698,183  | KIF2B, TOM1L1        | NA            | 5             | PacBio Only |                 |
| C5-A2LX | 56      | 4912   | L2       |                  | chr17:52,721,343  | KIF2B, TOM1L1        | NA            | 5             |             |                 |
| C5-A2LX | 56      | 1294   | E1       |                  | chr17:52,721,272  | KIF2B, TOM1L1        | NA            | 2             |             |                 |
| C5-A2LX | 57      | 3631   | E2       | 17q24.2          | chr17:64,556,231  | PRKCA                | Intron        | 59            | PacBio Only |                 |
| C5-A2LX | 57      | 6798   | L1       |                  | chr17:64,570,371  | PRKCA                | Intron        | 176           |             |                 |
| C5-A2LX | 57      | 1433   | E1       |                  | chr17:64,576,064  | PRKCA                | Intron        | 184           |             |                 |
| C5-A2LX | 58      | 47     | URR      | 17q24.3          | chr17:70,815,972  | SLC39A11             | Intron        | 10            | PacBio Only |                 |
| C5-A2LX | 58      | 6314   | L1       |                  | chr17:70,832,367  | SLC39A11             | Intron        | 3             |             |                 |
| C5-A2LX | 59      | 566    | E7       | 17q25.2          | chr17:75,035,488  | LOC105371899, SNHG20 | NA            | 37            | PacBio Only |                 |
| C5-A2LX | 59      | 637    | E7       |                  | chr17:75,054,362  | LOC105371899, SNHG20 | NA            | 12            |             |                 |
| C5-A2LX | 59      | 6132   | L1       |                  | chr17:75,061,005  | LOC105371899, SNHG20 | NA            | 112           |             |                 |
| C5-A2LX | 59      | 4640   | L2       |                  | chr17:75,061,767  | LOC105371899, SNHG20 | NA            | 155           |             |                 |
| C5-A2LX | 59      | 1489   | E1       |                  | chr17:75,070,448  | LOC105371899, SNHG20 | NA            | 6             |             |                 |
| C5-A2LX | 59      | 480    | E6       |                  | chr17:75,075,293  | LOC105371899, SNHG20 | NA            | 10            |             |                 |
| C5-A2LX | 59      | 7031   | L1       |                  | chr17:75,102,942  | SEC14L1              | Intron        | 7             |             |                 |
| C5-A2LX | 59      | 6287   | L1       |                  | chr17:75,113,399  | SEC14L1              | Intron        | 5             |             |                 |
| C5-A2LX | 60      | 675    | E7       | 18p11.32         | chr18:1,070,771   | LINC01904, LINC00470 | NA            | 7             | PacBio Only |                 |
| C5-A2LX | 60      | 1862   | E1       |                  | chr18:1,070,776   | LINC01904, LINC00470 | NA            | 9             |             |                 |

**Supplementary Table S4 (continued). Summary of viral integrations identified by PacBio long-read sequencing of HPV-enriched ICC tumor DNA.** Details of each unique, chimeric viral-human breakpoint identified by PacBio sequencing. For each breakpoint, we provide viral nucleotide and gene location, human chromosome band, human nucleotide and gene location, gene location (intron or exon), number of supporting PacBio reads, and clonality as quantified by integration allele fraction using sample matched TCGA data (IAF). \*TCGA low-pass WGS used to calculate IAF. \*\*TCGA WXS data used to calculate IAF. No value in IAF column = ViFi program did not detect viral integration within 500 bp of listed breakpoint coordinates.00

| TCGA ID | Event # | HPV bp | HPV Gene | Human Chrom Band | Human bp         | Human Gene/Locus     | Gene Location | PacBio Read # | Validation                  | Clonality (IAF) |
|---------|---------|--------|----------|------------------|------------------|----------------------|---------------|---------------|-----------------------------|-----------------|
| C5-A2LX | 61      | 6346   | L1       | 18q11.2          | chr18:23,664,478 | SS18                 | Intron        | 3             | PacBio Only                 |                 |
| C5-A2LX | 61      | 1563   | E1       |                  | chr18:23,721,584 | PSMA8                | Intron        | 3             |                             |                 |
| C5-A2LX | 61      | 5780   | L1       |                  | chr18:23,748,158 | PSMA8                | Intron        | 13            |                             |                 |
| C5-A2LX | 61      | 1862   | E1       |                  | chr18:23,748,391 | PSMA8                | Intron        | 20            |                             |                 |
| C5-A2LX | 62      | 1860   | E1       | 19p12            | chr19:22,922,204 | ZNF492, ZNF99        | NA            | 43            | PacBio Only                 |                 |
| C5-A2LX | 62      | 3801   | E2       |                  | chr19:22,922,111 | ZNF492, ZNF99        | NA            | 7             |                             |                 |
| C5-A2LX | 63      | 1553   | E1       | 19q13.12         | chr19:37,204,836 | ZNF567               | Intron        | 4             | PacBio Only                 |                 |
| C5-A2LX | 64      | 6956   | L1       | 20p13            | chr20:640,969    | SRXN1, SCRT2         | NA            | 234           | PacBio Only                 |                 |
| C5-A2LX | 64      | 1884   | E1       |                  | chr20:649,521    | SCRT2                | Intron        | 165           |                             |                 |
| C5-A2LX | 65      | 2043   | E1       | 20p12.2          | chr20:11,443,787 | LOC339593, LINC00687 | NA            | 17            | PacBio Only                 |                 |
| C5-A2LX | 65      | 4524   | L2       |                  | chr20:11,533,582 | LOC339593, LINC00687 | NA            | 11            |                             |                 |
| C5-A2LX | 66      | 7778   | URR      | 20q12            | chr20:39,063,515 | LINC01370, MAFB      | NA            | 12            | PacBio Only                 |                 |
| C5-A2LX | 67      | 4340   | L2       | 20q13.2          | chr20:53,697,420 | DOK5, LINC01441      | NA            | 9             | PacBio Only                 |                 |
| C5-A2LX | 68      | 2324   | E1       | Xq11.2           | chrX:64,439,258  | ZC4H2, ZC3H12B       | NA            | 24            | PacBio Only                 | *0.667          |
| C5-A2LX | 69      | 153    | E6       | Xq21.32          | chrX:92,285,160  | MIR4454, NAP1L3      | NA            | 4             | PacBio Only                 |                 |
| C5-A2LX | 70      | 5598   | L2       | Xq21.33          | chrX:93,525,261  | FAM133A, MIR548M     | NA            | 9             | PacBio Only                 |                 |
| C5-A2LX | 70      | 2628   | E1       |                  | chrX:93,525,234  | FAM133A, MIR548M     | NA            | 54            |                             |                 |
| C5-A2LX | 70      | 472    | E6       |                  | chrX:93,530,840  | FAM133A, MIR548M     | NA            | 4             |                             |                 |
| C5-A2LX | 71      | 4086   | E5       | Xq25             | chrX:126,550,794 | PRR32, ACTRT1        | NA            | 14            | PacBio Only                 | *1.000          |
| C5-A2LX | 71      | 6402   | L1       |                  | chrX:126,550,845 | PRR32, ACTRT1        | NA            | 7             |                             | *1.000          |
| C5-A2LX | 72      | 7894   | URR      | Xq28             | chrX:151,980,117 | MAGEA3, CETN2        | NA            | 3             | PacBio Only                 |                 |
| C5-A2LX | 72      | 458    | E6       |                  | chrX:151,981,250 | MAGEA3, CETN2        | NA            | 150           |                             |                 |
| C5-A2LX | 72      | 2215   | E1       |                  | chrX:152,002,205 | NSDHL                | Intron        | 7             |                             |                 |
| C5-A2LX | 72      | 6800   | L1       |                  | chrX:152,008,047 | NSDHL                | Intron        | 10            |                             |                 |
| C5-A2LX | 72      | 2652   | E1       |                  | chrX:152,013,670 | NSDHL                | Intron        | 9             |                             |                 |
| C5-A2LX | 72      | 6616   | L1       |                  | chrX:152,032,170 | NSDHL                | Intron        | 33            |                             |                 |
| C5-A2LX | 72      | 936    | E1       |                  | chrX:152,076,199 | NSDHL, ZNF185        | NA            | 3             |                             |                 |
| C5-A2LX | 72      | 5947   | L1       |                  | chrX:152,079,913 | NSDHL, ZNF185        | NA            | 3             |                             |                 |
| C5-A1ML | 73      | 2175   | E1       | 8p12             | chr8:34,837,123  | LINC01288, UNC5D     | NA            | 3             | TCGA (WGS)                  | 0.069           |
| C5-A1ML | 73      | 7830   | URR      |                  | chr8:34,837,123  | LINC01288, UNC5D     | NA            | 1             |                             | 0.069           |
| C5-A1ML | 74      | 3081   | E2       | 10q11.21         | chr10:43,055,741 | ZNF37BP, ZNF33B      | NA            | 1             | TCGA (WGS)                  |                 |
| C5-A1ML | 74      | 371    | E6       |                  | chr10:43,061,049 | ZNF37BP, ZNF33B      | NA            | 1             |                             | 0.095; 0.046    |
| C5-A1ML | 75      | 4893   | L2       | Xq28             | chrX:149,550,333 | MAMLD1               | Intron        | 152           | TCGA (WGS); MCW<br>Illumina | 0.155           |
| C5-A1ML | 75      | 2851   | E2       |                  | chrX:149,550,454 | MAMLD1               | Intron        | 79            |                             | 0.155           |

**Supplementary Table S4 (continued). Summary of viral integrations identified by PacBio long-read sequencing of HPV-enriched ICC tumor DNA.** Details of each unique, chimeric viral-human breakpoint identified by PacBio sequencing. For each breakpoint, we provide viral nucleotide and gene location, human chromosome band, human nucleotide and gene location, gene location (intron or exon), number of supporting PacBio reads, and clonality as quantified by integration allele fraction using sample matched TCGA data (IAF). \*TCGA low-pass WGS used to calculate IAF. \*\*TCGA WXS data used to calculate IAF. No value in IAF column = ViFi program did not detect viral integration within 500 bp of listed breakpoint coordinates.00

| TCGA ID | Event # | HPV bp | HPV Gene         | Human Chrom Band | Human bp          | Human Gene/Locus     | Gene Location | PacBio Read # | Validation                       | Clonality (IAF) |
|---------|---------|--------|------------------|------------------|-------------------|----------------------|---------------|---------------|----------------------------------|-----------------|
| C5-A1ML | 76      | 2483   | E1               | 7p22.2           | chr7:4,200,858    | SDK1                 | Intron        | 444           | PacBio Only                      |                 |
| C5-A1ML | 76      | 2689   | E1               |                  | chr7:4,200,864    | SDK1                 | Intron        | 119           |                                  |                 |
| C5-A1ML | 76      | 2556   | E1               |                  | chr7:4,229,987    | SDK1                 | Intron        | 81            |                                  |                 |
| C5-A1ML | 76      | 5687   | L1               |                  | chr7:4,271,915    | SDK1                 | Intron        | 15            |                                  |                 |
| C5-A1ML | 76      | 7399   | URR              |                  | chr7:4,306,485    | SDK1                 | Exon          | 28            |                                  |                 |
| C5-A1ML | 77      | 4764   | L2               | 10q23.33         | chr10:96,306,733  | HELLS                | Intron        | 11            | PacBio Only                      |                 |
| C5-A1ML | 77      | 3956   | E5               |                  | chr10:96,312,993  | HELLS                | Intron        | 2             |                                  |                 |
| C5-A1ML | 77      | 7038   | L1               |                  | chr10:96,319,211  | HELLS                | Intron        | 1             |                                  |                 |
| C5-A3HD | 78      | 1616   | E1               | 1p13.2           | chr1:114,306,721  | RSBN1                | Exon          | 33            | TCGA (RNA, WGS*)                 | *0.103          |
| C5-A3HD | 78      | 2095   | E1               |                  | chr1:114,340,522  | RSBN1                | Exon          | 29            |                                  | *0.317          |
| C5-A3HD | 78      | 1112   | E1               |                  | chr1:114,347,453  | RSBN1                | Intron        | 42            |                                  | *0.167          |
| C5-A3HD | 78      | 3212   | E2               |                  | chr1:114,364,269  | AP4B1-AS1; PTPN22    | Intron        | 6             |                                  | *0.065          |
| C5-A3HD | 79      | 2815   | E1               | 7p22.1           | chr7:5,542,031    | FBXL18               | Intron        | 2             | TCGA (WGS*)                      | *0.238          |
| C5-A3HD | 80      | 3426   | E2               | 7q31.1           | chr7:113,711,528  | PPP1R3A, FOXP2       | NA            | 91            | TCGA (RNA, WGS*)                 | *0.179          |
| C5-A3HD | 80      | 331    | E6               |                  | chr7:113,734,716  | FOXP2                | Intron        | 18            |                                  | *0.037; 0.104   |
| C5-A3HD | 80      | 4161   | E5 $\alpha$ , L2 |                  | chr7:113,735,434  | FOXP2                | Intron        | 36            |                                  | *0.104          |
| C5-A3HD | 80      | 2821   | E2               |                  | chr7:113,735,913  | FOXP2                | Intron        | 84            |                                  | *0.104          |
| C5-A0TN | 81      | 2593   | E1               | 2q32.3           | chr2:195,586,245  | LINC01821, LINC01790 | NA            | 7             | TCGA (RNA, WGS)                  | 0.233           |
| C5-A0TN | 82      | 6054   | L1               | 3q21.3           | chr3:126,849,193  | PLXNA1, C3ORF56      | NA            | 16            | TCGA (WGS)                       | 0.231           |
| C5-A2LV | 83      | 2467   | E1               | 15q25.2          | chr15:84,040,546  | BNC1, SH3GL3         | NA            | 132           | TCGA (RNA, WGS)                  | 0.141           |
| C5-A2LV | 83      | 5904   | L1               |                  | chr15:84,040,546  | BNC1, SH3GL3         | NA            | 132           |                                  | 0.141           |
| C5-A8XH | 84      | 1292   | E1               | 17q25.3          | chr17:76,629,330  | SCAT1, CYTH1         | NA            | 7             | MCW Illumina                     | **1.000         |
| C5-A8XH | 84      | 2960   | E2               |                  | chr17:76,828,332  | USP36                | Intron        | 132           |                                  | **0.878         |
| C5-A1M9 | 85      | 3123   | E2               | 8q24.21          | chr8:128,993,409  | PVT1                 | Intron        | 26            | TCGA (RNA, WGS);<br>MCW Illumina | 0.129           |
| C5-A1M9 | 85      | 7611   | URR              |                  | chr8:129,013,913  | PVT1                 | Intron        | 5             |                                  |                 |
| C5-A1M9 | 85      | *4857  | *L2              |                  | *chr8:129,022,423 | PVT1                 | Intron        | *1            |                                  |                 |
| C5-A1M9 | 86      | *5489  | *L2              | 17q12            | *chr17:37,874,359 | ERBB2                | Intron        | *4            | TCGA (RNA, WGS)                  | 0.173           |
| C5-A2LT | 87      | *3138  | *E2              | 13q12.11         | *chr13:21,031,963 | CRYL1                | Intron        | *1            | TCGA (RNA, WGS)                  | 0.099           |

**Supplementary Table S4 (continued). Summary of viral integrations identified by PacBio long-read sequencing of HPV-enriched ICC tumor DNA.** Details of each unique, chimeric viral-human breakpoint identified by PacBio sequencing. For each breakpoint, we provide viral nucleotide and gene location, human chromosome band, human nucleotide and gene location, gene location (intron or exon), number of supporting PacBio reads, and clonality as quantified by integration allele fraction using sample matched TCGA data (IAF). \*TCGA low-pass WGS used to calculate IAF. \*\*TCGA WXS data used to calculate IAF. No value in IAF column = ViFi program did not detect viral integration within 500 bp of listed breakpoint coordinates.00

| Event | Gene symbol         | molecule type (IPA)     | Zscore | OS HR | OS pval | RFS HR | RFS pval |
|-------|---------------------|-------------------------|--------|-------|---------|--------|----------|
| 1     | <i>MRPL35</i>       | OTHER                   | -1.59  | 0.7   | 0.10    | 0.6    | 0.22     |
| 2     | <i>C2orf83</i>      | TRANSPORTER             | 4.02   | 1.6   | 0.05    | 0.6    | 0.27     |
| 2     | <i>COL4A4</i>       | OTHER                   | 2.86   | 1.6   | 0.06    | 3.9    | 0.01     |
| 4     | <i>MROH5</i>        | OTHER                   | 1.63   | 1.5   | 0.11    | 2.2    | 0.05     |
| 4     | <i>GLI4</i>         | TRANSCRIPTION REGULATOR | 1.83   | 0.8   | 0.28    | 2.4    | 0.06     |
| 4     | <i>DENND3</i>       | OTHER                   | 2.45   | 0.7   | 0.10    | 2.0    | 0.09     |
| 6     | <i>SPSB2</i>        | OTHER                   | 1.77   | 1.3   | 0.36    | 2.0    | 0.07     |
| 6     | <i>EMG1</i>         | ENZYME                  | 2.24   | 1.5   | 0.12    | 0.6    | 0.32     |
| 6     | <i>USP5</i>         | PEPTIDASE               | 1.75   | 1.8   | 0.06    | 1.9    | 0.18     |
| 6     | <i>PHB2</i>         | TRANSCRIPTION REGULATOR | 1.76   | 1.6   | 0.05    | 1.6    | 0.36     |
| 7     | <i>TAOK3</i>        | KINASE                  | 3.80   | 1.5   | 0.13    | 2.3    | 0.09     |
| 8     | <i>POLR1D</i>       | ENZYME                  | 1.78   | 1.7   | 0.08    | 0.5    | 0.10     |
| 8     | <i>POMP</i>         | OTHER                   | 4.83   | 1.4   | 0.15    | 2.8    | 0.02     |
| 9     | <i>NF1P2</i>        | OTHER                   | 5.22   | 1.9   | 0.01    | 0.6    | 0.29     |
| 10    | <i>C17orf98</i>     | OTHER                   | 2.65   | 1.4   | 0.17    | 1.7    | 0.17     |
| 10    | <i>WIPF2</i>        | OTHER                   | -1.76  | 0.7   | 0.09    | 1.9    | 0.09     |
| 10    | <i>RPL23</i>        | OTHER                   | 1.74   | 1.5   | 0.12    | 0.5    | 0.15     |
| 11    | <i>SPATA32</i>      | OTHER                   | 1.51   | 0.7   | 0.20    | 2.2    | 0.04     |
| 11    | <i>MPP2</i>         | KINASE                  | 3.31   | 0.7   | 0.21    | 2.1    | 0.18     |
| 11    | <i>HEXIM1</i>       | TRANSCRIPTION REGULATOR | 6.66   | 1.4   | 0.13    | 2.8    | 0.01     |
| 12    | <i>GADD45B</i>      | OTHER                   | 1.96   | 0.6   | 0.05    | 2.4    | 0.03     |
| 12    | <i>GNA11</i>        | ENZYME                  | -1.76  | 0.7   | 0.25    | 0.6    | 0.19     |
| 13    | <i>ZBED4</i>        | TRANSCRIPTION REGULATOR | -1.64  | 1.8   | 0.07    | 0.5    | 0.11     |
| 13    | <i>BRD1</i>         | OTHER                   | -1.66  | 0.6   | 0.04    | 0.4    | 0.03     |
| 13    | <i>TYMP</i>         | GROWTH FACTOR           | 1.98   | 1.5   | 0.10    | 0.5    | 0.10     |
| 14    | <i>LOC100129534</i> | OTHER                   | 2.88   | 0.7   | 0.08    | 1.9    | 0.10     |
| 14    | <i>MORN1</i>        | OTHER                   | 3.43   | 0.6   | 0.07    | 1.8    | 0.13     |
| 15    | <i>GADD45A</i>      | OTHER                   | 3.49   | 1.7   | 0.05    | 0.6    | 0.15     |
| 16    | <i>ISG20L2</i>      | ENZYME                  | -1.62  | 1.6   | 0.12    | 0.5    | 0.06     |
| 16    | <i>SCAMP3</i>       | TRANSPORTER             | 1.55   | 2.3   | 0.01    | 2.4    | 0.09     |
| 16    | <i>CHTOP</i>        | OTHER                   | 2.11   | 0.8   | 0.37    | 2.3    | 0.07     |
| 16    | <i>LAMTOR2</i>      | OTHER                   | 1.55   | 1.4   | 0.12    | 0.6    | 0.25     |
| 16    | <i>EFNA4</i>        | KINASE                  | 4.71   | 1.5   | 0.08    | 1.4    | 0.39     |
| 16    | <i>EFNA3</i>        | KINASE                  | 5.55   | 1.8   | 0.02    | 3.0    | 0.06     |
| 16    | <i>BGLAP</i>        | OTHER                   | 2.27   | 0.6   | 0.07    | 2.0    | 0.11     |
| 16    | <i>RPS27</i>        | OTHER                   | 3.60   | 1.5   | 0.15    | 0.6    | 0.15     |
| 16    | <i>BCAN</i>         | OTHER                   | 1.78   | 1.3   | 0.32    | 1.8    | 0.14     |
| 16    | <i>ADAM15</i>       | PEPTIDASE               | 2.46   | 1.2   | 0.46    | 1.8    | 0.14     |
| 16    | <i>FDPS</i>         | ENZYME                  | 1.68   | 1.8   | 0.01    | 2.6    | 0.05     |
| 16    | <i>CKS1B</i>        | KINASE                  | 2.57   | 1.5   | 0.14    | 1.6    | 0.26     |
| 17    | <i>TNN</i>          | OTHER                   | 2.32   | 0.6   | 0.03    | 2.3    | 0.13     |
| 24    | <i>CSN1S1</i>       | OTHER                   | 1.70   | 1.6   | 0.05    | 0.7    | 0.28     |

**Supplementary Table S5. Final list of 84 candidate IDGs remaining after filtering based on integration event clonality, Z-score, and association with ICC survival.** List of genes passing each of our criteria for qualification as a candidate IDG. Information included for each gene: Corresponding PacBio integration event number (Supplementary Table S4; column 2), gene symbol (NCBI), molecule type (IPA), Z-score, and overall survival (OS) and recurrence-free survival (RFS) hazard ratios (HR) and corresponding p-values (pval). IDGs highlighted in yellow are those further studied in functional assays.

| Event | Gene symbol        | molecule type (IPA)     | Zscore | OS HR | OS pval | RFS HR | RFS pval |
|-------|--------------------|-------------------------|--------|-------|---------|--------|----------|
| 29    | <i>LIFR</i>        | TRANSMEMBRANE RECEPTOR  | 11.04  | 0.8   | 0.25    | 2.7    | 0.03     |
| 74    | <i>HNRNPF</i>      | OTHER                   | -1.93  | 0.6   | 0.06    | 2.1    | 0.07     |
| 75    | <i>PRRG3</i>       | OTHER                   | 4.13   | 1.5   | 0.09    | 2.4    | 0.03     |
| 78    | <i>PHTF1</i>       | TRANSCRIPTION REGULATOR | 4.77   | 0.8   | 0.33    | 2.6    | 0.01     |
| 78    | <i>RSBN1</i>       | OTHER                   | 17.24  | 0.7   | 0.13    | 2.0    | 0.10     |
| 78    | <i>TRIM33</i>      | TRANSCRIPTION REGULATOR | 1.93   | 0.6   | 0.06    | 2.2    | 0.10     |
| 78    | <i>NRAS</i>        | ENZYME                  | 1.56   | 1.3   | 0.28    | 4.5    | 0.01     |
| 79    | <i>RBAK-RBAKDN</i> | OTHER                   | 2.26   | 1.4   | 0.13    | 2.0    | 0.20     |
| 79    | <i>RBAK</i>        | TRANSCRIPTION REGULATOR | 2.26   | 1.7   | 0.04    | 0.7    | 0.45     |
| 80    | <i>ZNF277</i>      | TRANSCRIPTION REGULATOR | -2.35  | 1.5   | 0.14    | 0.6    | 0.14     |
| 81    | <i>SLC39A10</i>    | TRANSPORTER             | 1.93   | 2.0   | 0.00    | 4.0    | 0.00     |
| 82    | <i>ZXDC</i>        | TRANSCRIPTION REGULATOR | -1.95  | 0.5   | 0.02    | 0.6    | 0.16     |
| 82    | <i>SNX4</i>        | TRANSPORTER             | -1.59  | 0.7   | 0.20    | 0.8    | 0.50     |
| 82    | <i>ZNF148</i>      | TRANSCRIPTION REGULATOR | -1.64  | 0.5   | 0.01    | 0.7    | 0.42     |
| 83    | <i>ZNF592</i>      | TRANSCRIPTION REGULATOR | -1.85  | 0.7   | 0.19    | 0.6    | 0.15     |
| 83    | <i>WHAMM</i>       | OTHER                   | -1.52  | 0.4   | 0.00    | 0.5    | 0.09     |
| 83    | <i>SEC11A</i>      | PEPTIDASE               | 1.67   | 1.4   | 0.19    | 2.0    | 0.08     |
| 83    | <i>BNC1</i>        | TRANSCRIPTION REGULATOR | 1.85   | 1.5   | 0.11    | 0.4    | 0.02     |
| 84    | <i>METTL23</i>     | OTHER                   | 1.93   | 0.7   | 0.12    | 2.0    | 0.19     |
| 84    | <i>MFSD11</i>      | OTHER                   | 2.18   | 1.5   | 0.14    | 1.9    | 0.13     |
| 84    | <i>SLC26A11</i>    | TRANSPORTER             | 1.52   | 1.8   | 0.07    | 1.9    | 0.11     |
| 84    | <i>SGSH</i>        | ENZYME                  | 3.97   | 1.7   | 0.03    | 2.1    | 0.18     |
| 84    | <i>PGS1</i>        | ENZYME                  | 3.80   | 0.6   | 0.12    | 3.2    | 0.04     |
| 84    | <i>CANT1</i>       | ENZYME                  | 2.50   | 1.7   | 0.03    | 3.2    | 0.00     |
| 84    | <i>MGAT5B</i>      | ENZYME                  | 1.76   | 0.6   | 0.03    | 2.0    | 0.07     |
| 84    | <i>USP36</i>       | PEPTIDASE               | 15.68  | 1.4   | 0.19    | 2.4    | 0.07     |
| 84    | <i>EIF4A3</i>      | ENZYME                  | 4.76   | 0.5   | 0.01    | 2.0    | 0.07     |
| 84    | <i>RNF213</i>      | ENZYME                  | 2.50   | 0.7   | 0.16    | 2.0    | 0.18     |
| 84    | <i>CBX2</i>        | TRANSCRIPTION REGULATOR | 2.04   | 1.4   | 0.15    | 1.5    | 0.32     |
| 84    | <i>JMJD6</i>       | TRANSMEMBRANE RECEPTOR  | 1.79   | 1.7   | 0.04    | 1.4    | 0.40     |
| 84    | <i>LGALS3BP</i>    | TRANSMEMBRANE RECEPTOR  | 4.81   | 1.6   | 0.04    | 5.8    | 0.00     |
| 84    | <i>SEPTIN9</i>     | ENZYME                  | 2.23   | 1.6   | 0.05    | 2.7    | 0.01     |
| 84    | <i>RPTOR</i>       | OTHER                   | 3.39   | 1.5   | 0.19    | 2.7    | 0.09     |
| 84    | <i>GAA</i>         | ENZYME                  | 1.73   | 1.5   | 0.11    | 2.6    | 0.07     |
| 84    | <i>SRSF2</i>       | TRANSCRIPTION REGULATOR | 1.60   | 0.4   | 0.00    | 2.7    | 0.06     |
| 84    | <i>SOCS3</i>       | PHOSPHATASE             | 1.77   | 1.4   | 0.27    | 2.6    | 0.08     |
| 85    | <i>LRATD2</i>      | OTHER                   | 2.24   | 1.6   | 0.03    | 2.8    | 0.01     |
| 85    | <i>PVT1</i>        | OTHER                   | 12.17  | 1.5   | 0.19    | 0.5    | 0.06     |
| 86    | <i>MRPL45</i>      | OTHER                   | 2.10   | 0.5   | 0.04    | 2.2    | 0.04     |
| 86    | <i>LASP1</i>       | TRANSPORTER             | 2.12   | 1.7   | 0.02    | 2.7    | 0.01     |
| 86    | <i>KRT19</i>       | OTHER                   | 1.64   | 1.4   | 0.18    | 2.0    | 0.08     |
| 86    | <i>TOP2A</i>       | ENZYME                  | 1.68   | 0.7   | 0.09    | 2.2    | 0.05     |

**Supplementary Table S5. Final list of 84 candidate IDGs remaining after filtering based on integration event clonality, Z-score, and association with ICC survival.** List of genes passing each of our criteria for qualification as a candidate IDG. Information included for each gene: Corresponding PacBio integration event number (Supplementary Table S4; column 2), gene symbol (NCBI), molecule type (IPA), Z-score, and overall survival (OS) and recurrence-free survival (RFS) hazard ratios (HR) and corresponding p-values (pval). IDGs highlighted in yellow are those further studied in functional assays.

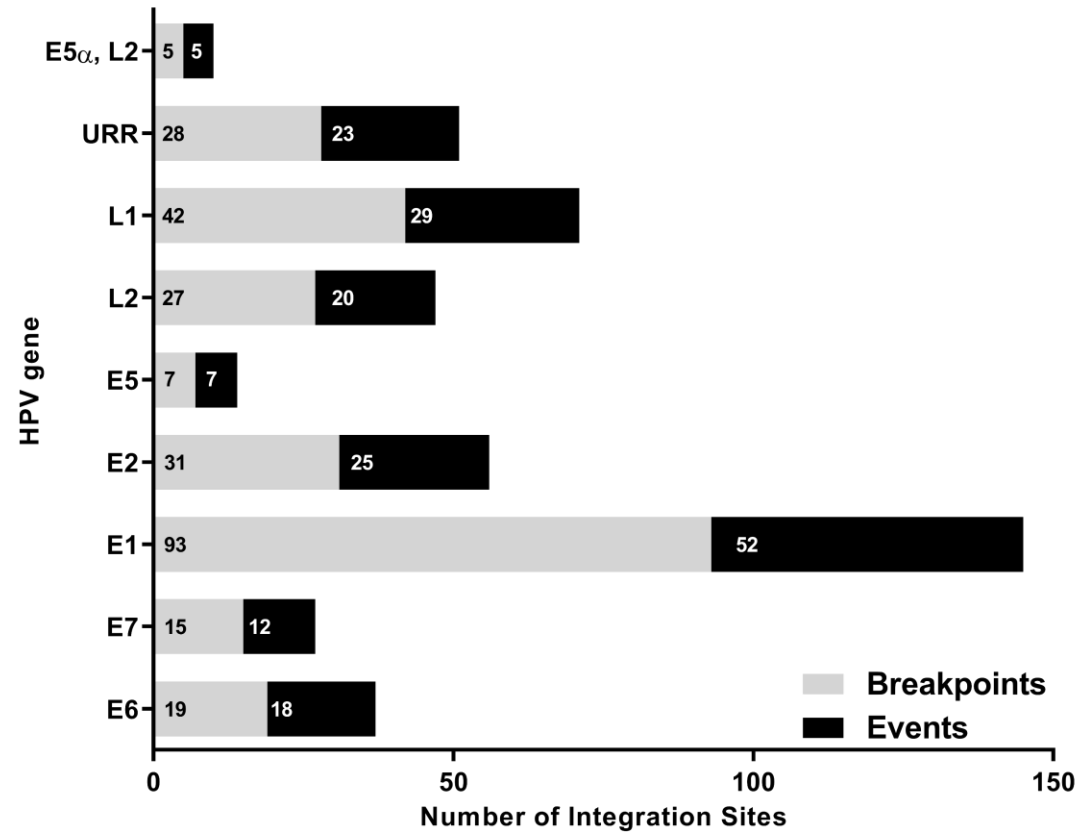

**Supplementary Figure S1. Frequency of viral breakpoints and integration events in HPV gene regions revealed by PacBio long-read sequencing.** The number of chimeric HPV-human breakpoints (gray) or integration events (black) found in each viral gene is plotted for all 8 samples. A breakpoint is defined as the unique nucleotide position of each human-HPV chimeric junction, while an integration event is defined as a collection of one or more chimeric HPV-human junctions occurring within 1.5Mb of each other.

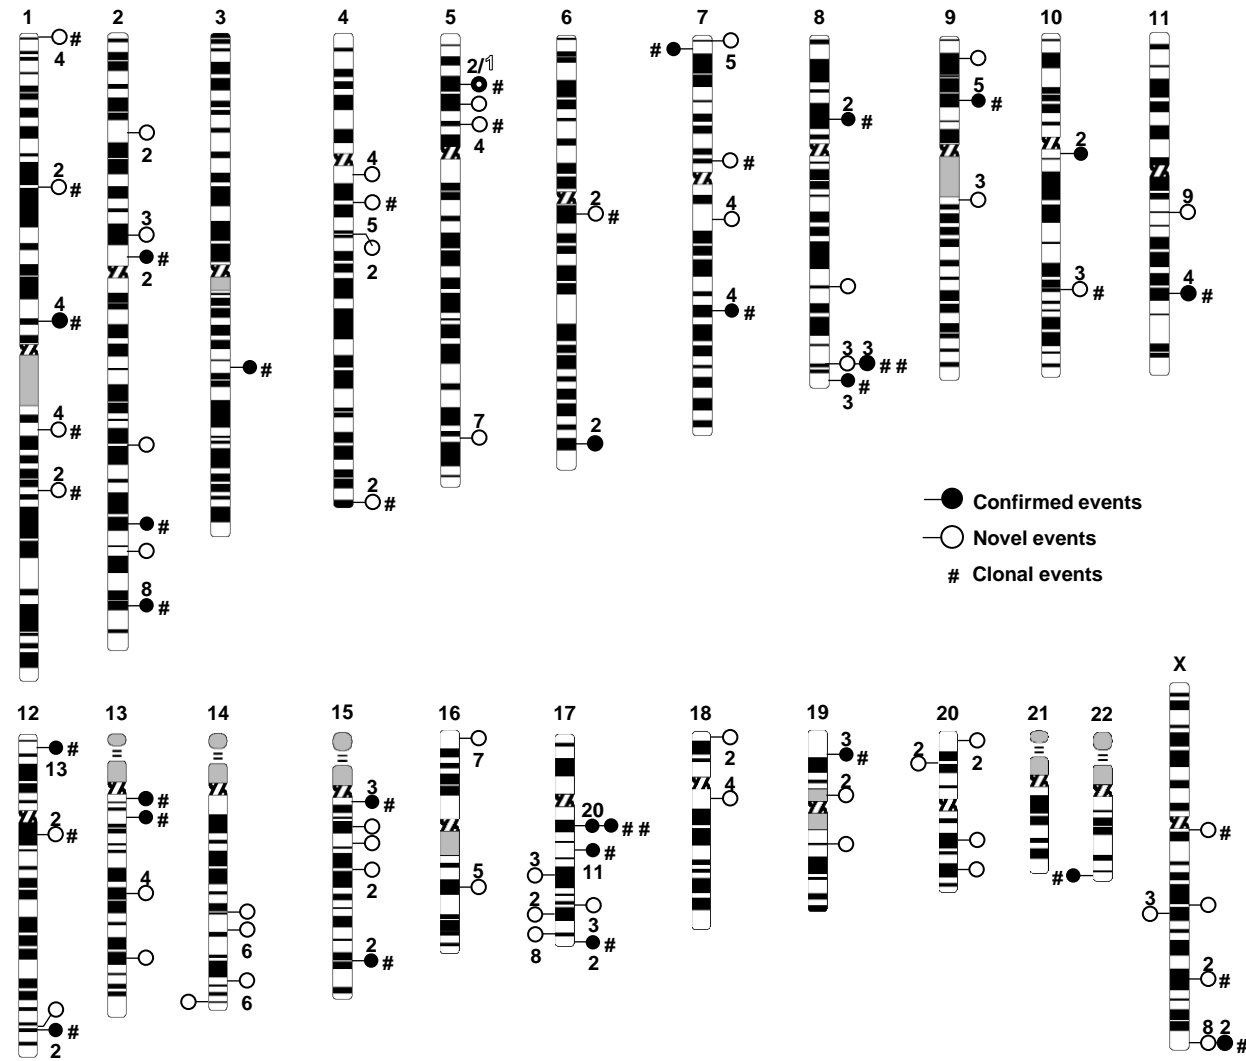

**Supplementary Figure S2. Chromosomal map of HPV integration sites detected by PacBio long-read sequencing of HPV-enriched ICC tumor DNA.** Chromosomal ideograms marked with each circle representing an integration event and number above or below representing the number of breakpoints comprising that event. No number indicates only one breakpoint identified in that event. Black-filled circles = sites identified in other datasets (TCGA). Open circles = sites found by PacBio sequencing and not originally reported by TCGA. # denotes a clonal event (IAF  $\geq$  10%, meaning at least 10% of reads covering the area of the integration had to harbor a human-viral chimeric breakpoint). ## denotes 2 unique clonal events



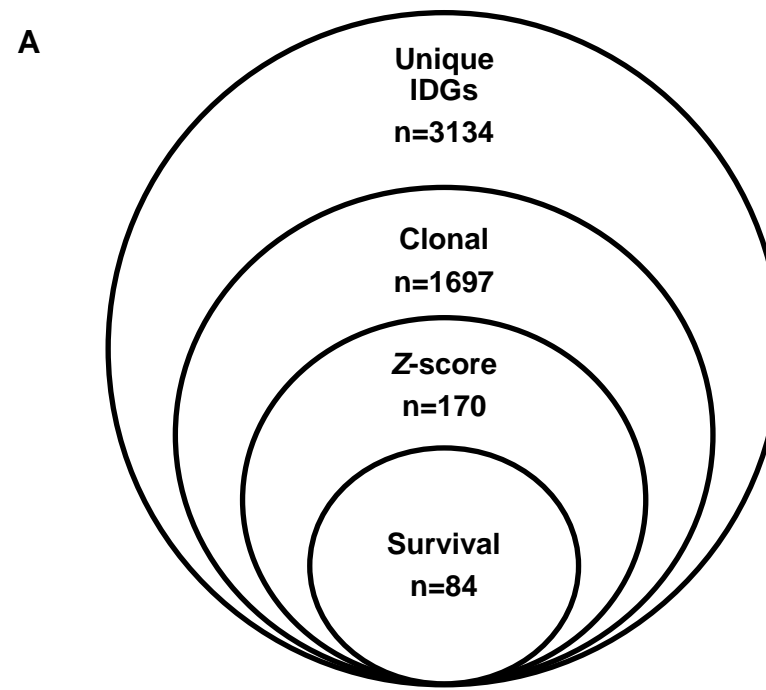

**B**

| Gene                   | Publication number |              |
|------------------------|--------------------|--------------|
|                        | Pan-cancer         | ICC-specific |
| <b>Known Oncogenes</b> |                    |              |
| <i>ERBB2</i>           | >29,000            | 224          |
| <i>RAD51B</i>          | 2,593              | 36           |
| <i>PVT1</i>            | 481                | 16           |
| <b>Candidate IDGs</b>  |                    |              |
| <i>BNC1</i>            | 35                 | 0            |
| <i>RSBN1</i>           | 3                  | 0            |
| <i>USP36</i>           | 14                 | 0            |
| <i>TAOK3</i>           | 8                  | 0            |

**Supplementary Figure S3. Filtering of candidate IDGs for functional prioritization.** Filtering of candidate IDGs (A) began with genes within 2Mb on either side of each integration event for each of the 8 samples, providing a total of 3399 genes (3134 unique). IDGs were first filtered based on clonal representation of their associated integration site, leaving 1697 potential IDGs. Next, genes were removed if they did not meet our tumor-specific expression criteria (Z-score cutoff of 1.5/-1.5), leaving 170 potential IDGs. The last filter was association with survival in TCGA ICC cohort (HR, *p*-value cutoff of 0.2), leaving a total of 84 candidate IDGs. PubMed literature search results of the 4 candidate IDGs suggest their unknown function in cervical cancer (B).

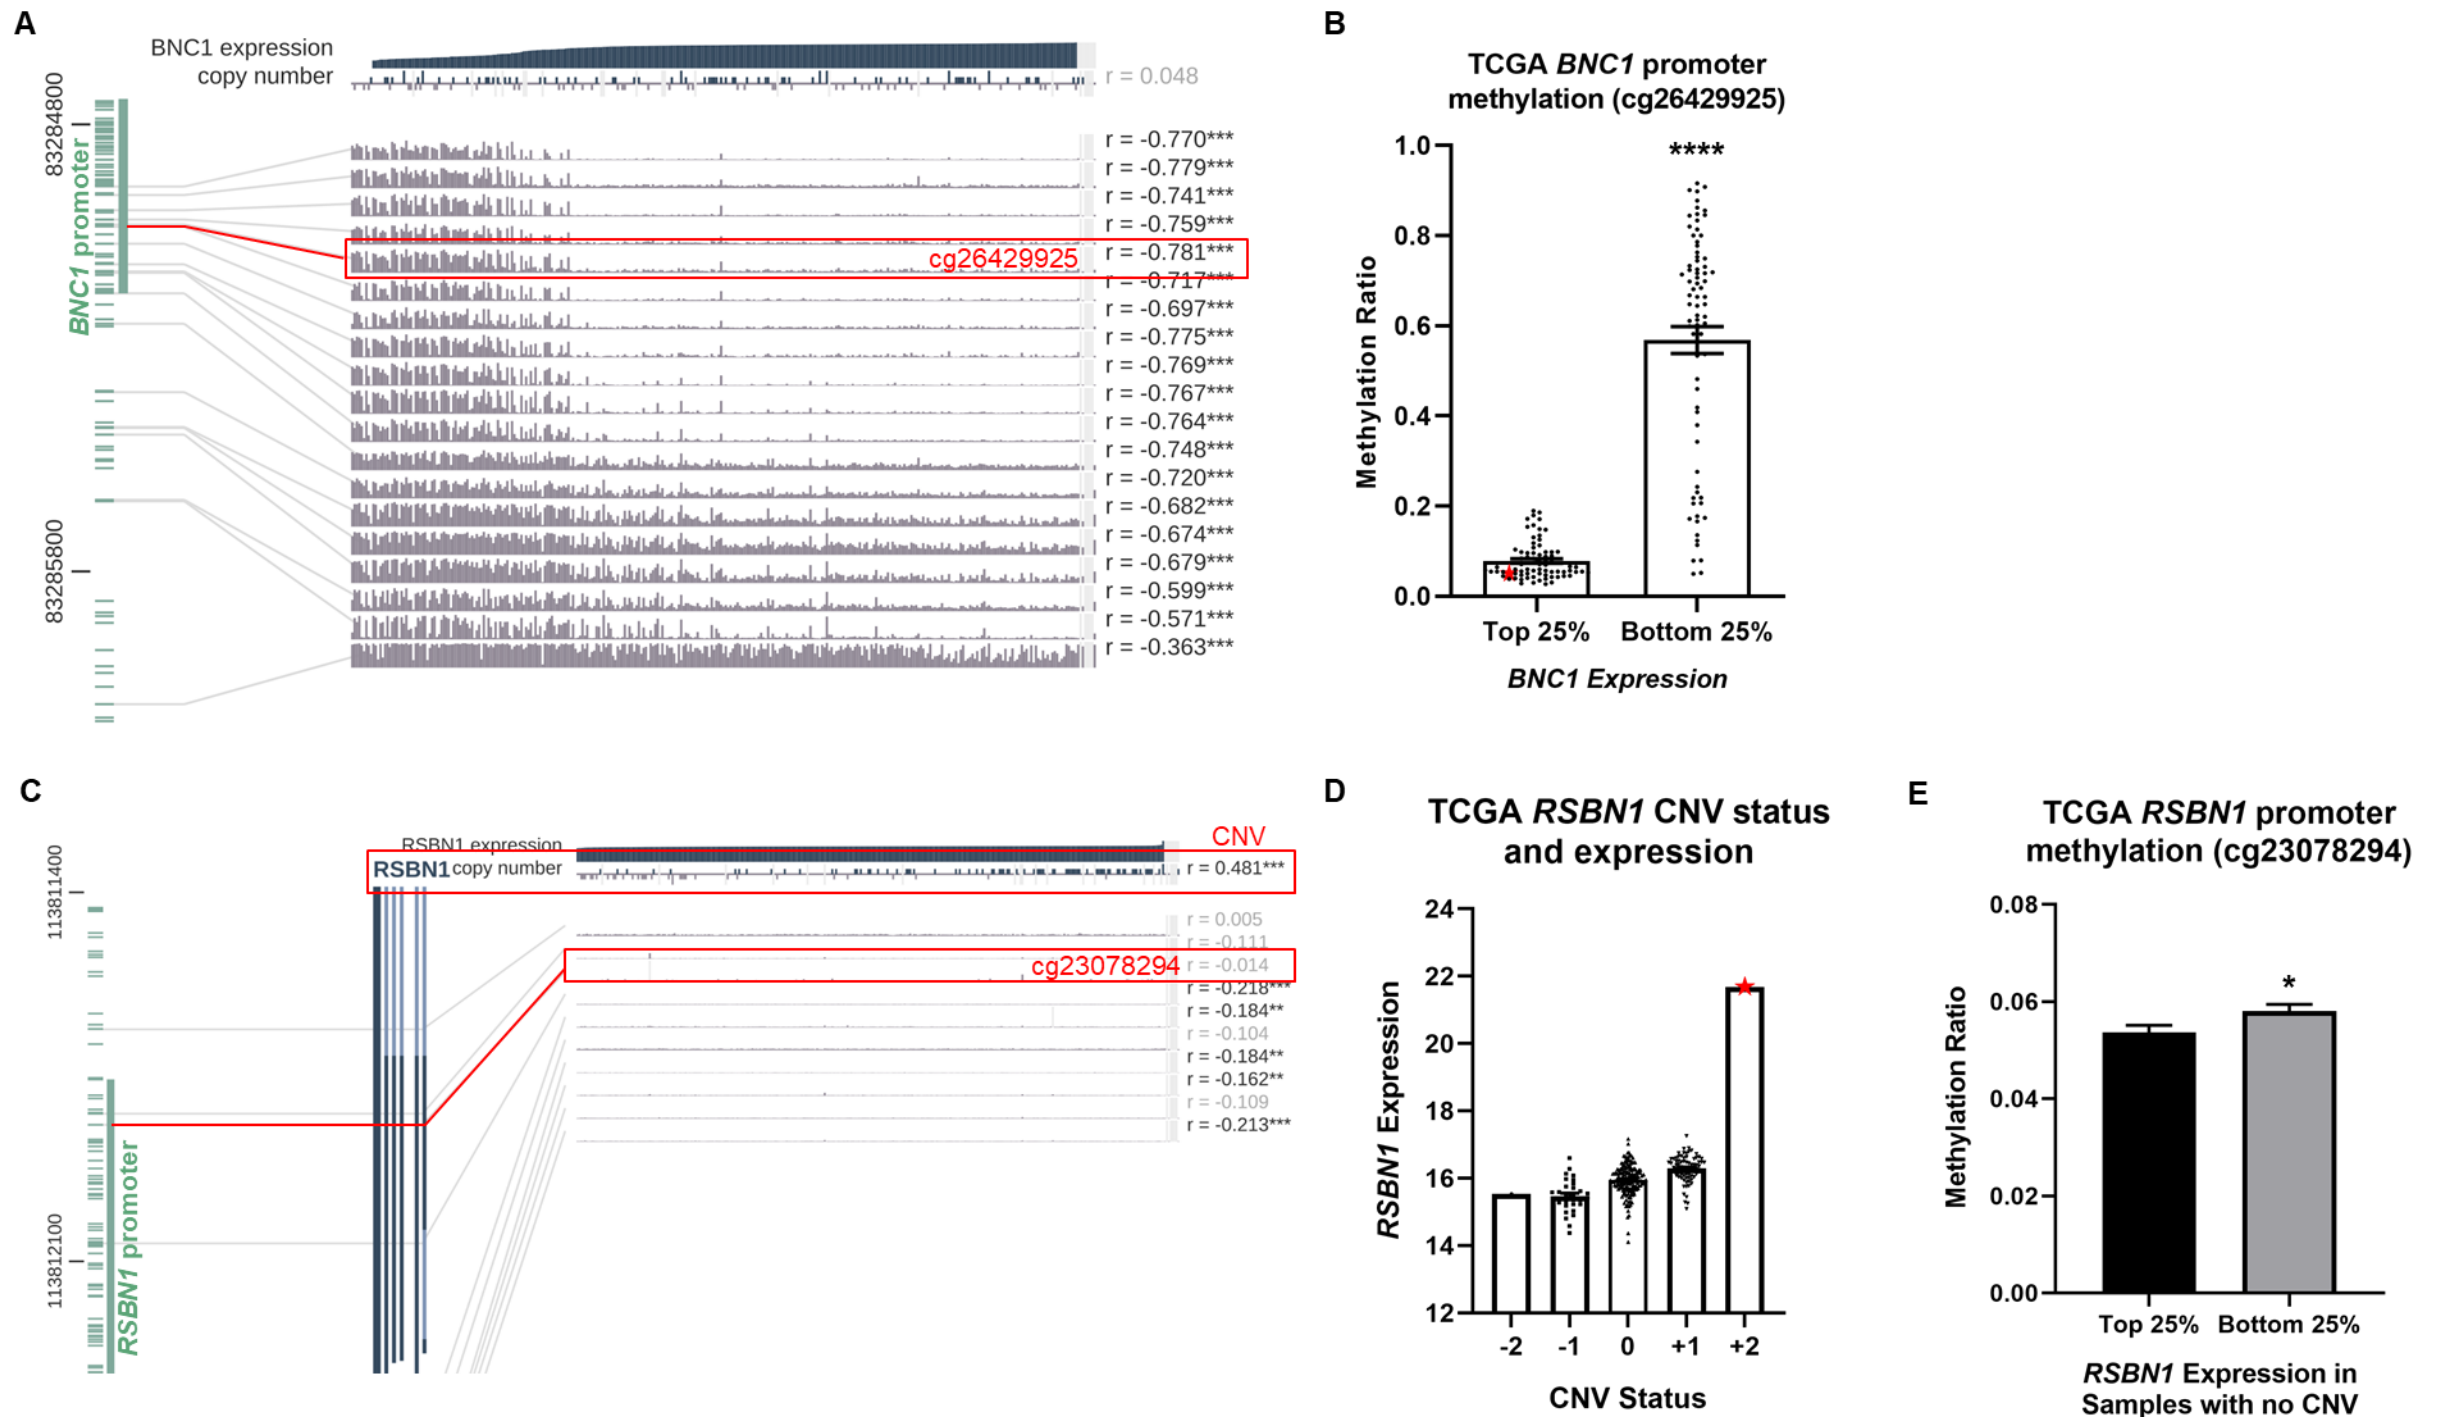

**Supplementary Figure S4. Potential regulation of *BNC1* and *RSBN1* expression in non-integrated ICC samples.** (A) MEXPRESS data depicting correlation of *BNC1* CpG methylation and expression in TCGA ICC cohort (n=304). *BNC1* promoter hypomethylation displayed the most significant correlation with high *BNC1* expression (cg26429925; \*\*\*p < 0.001). (B) Analysis of cg26429925 methylation in TCGA ICC cohort revealed significantly higher methylation of this site in samples comprising the bottom 25% of *BNC1* expressors versus those comprising the top 25% (\*\*\*\*p < 0.0001; integrated sample TCGA-C5-A2LV marked with red star). (C) High *RSBN1* expression was significantly correlated with copy number variation in the TCGA ICC cohort (MEXPRESS CNV; \*\*\*p < 0.001). (D) Plot of *RSBN1* expression as a function of CNV status using data from TCGA ICC cohort with the integrated sample (TCGA-C5-A3HD; red star). In TCGA ICC samples with no reported CNV in this area, methylation of a CpG site in the *RSBN1* promoter (cg23078294) was most negatively correlated with its expression. (E) Methylation of this site was significantly higher in samples comprising the bottom 25% of *RSBN1* expressors versus those comprising the top 25% (\*p < 0.05). Plotted data is presented as mean  $\pm$  standard error of the mean.

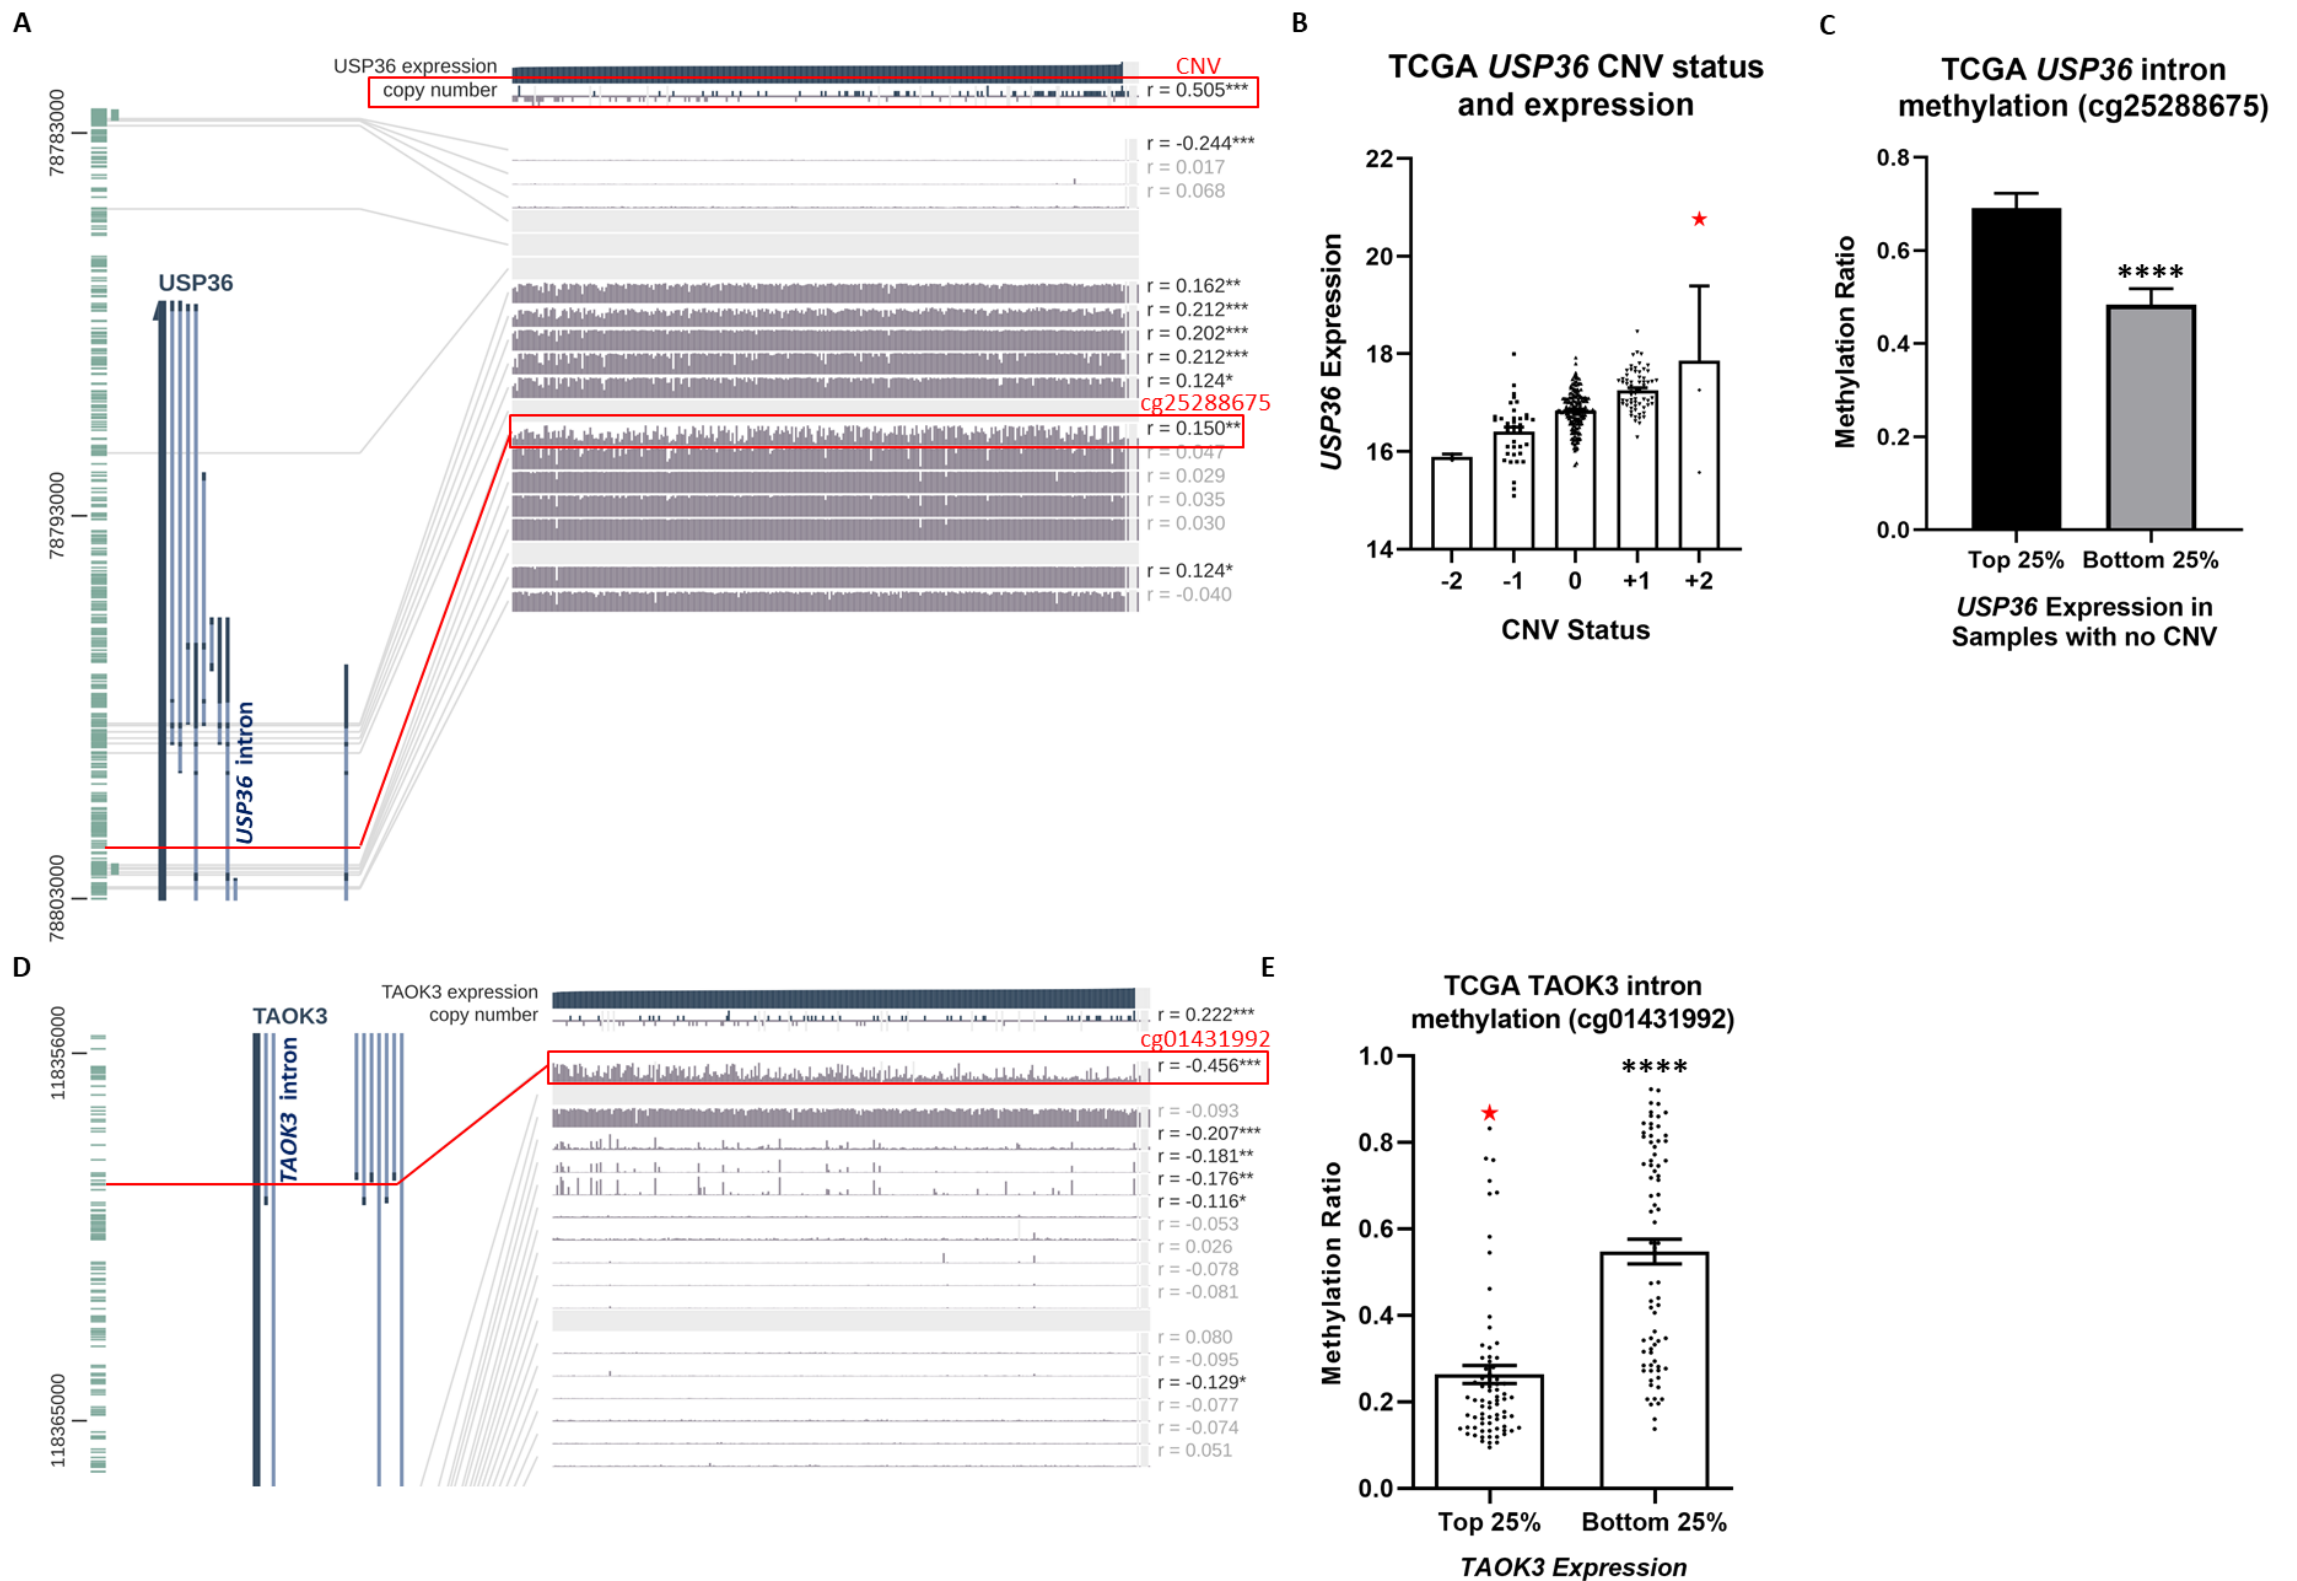

**Supplementary Figure S5. Potential regulation of *USP36* and *TAOK3* expression in non-integrated ICC samples.** (A) MEXPRESS showed *USP36* expression correlated most with copy number variation in TCGA ICC cohort (CNV;  $***p < 0.001$ ). (B) Plot of *USP36* expression as a function of CNV status using data from TCGA ICC cohort with the integrated sample (TCGA-C5-A8XH; red star). In TCGA ICC samples with no reported CNV in this area, methylation of a CpG site within intron 17 of *USP36* (cg25288675) was most positively correlated with its expression. (C) Methylation of cg25288675 was significantly lower in samples comprising the bottom 25% of *USP36* expressors versus those comprising the top 25% ( $****p < 0.0001$ ). (D) MEXPRESS showed *TAOK3* expression most correlated with methylation of a site within intron 1 (cg01431992;  $***p < 0.001$ ). (E) Analysis of cg01431992 methylation in TCGA ICC cohort revealed significantly higher methylation of this site in samples comprising the bottom 25% of *TAOK3* expressors versus those comprising the top 25% ( $****p < 0.0001$ ; red star denotes methylation ratio of integrated sample, TCGA-C5-A2LX). Plotted data is presented as mean  $\pm$  standard error of the mean.

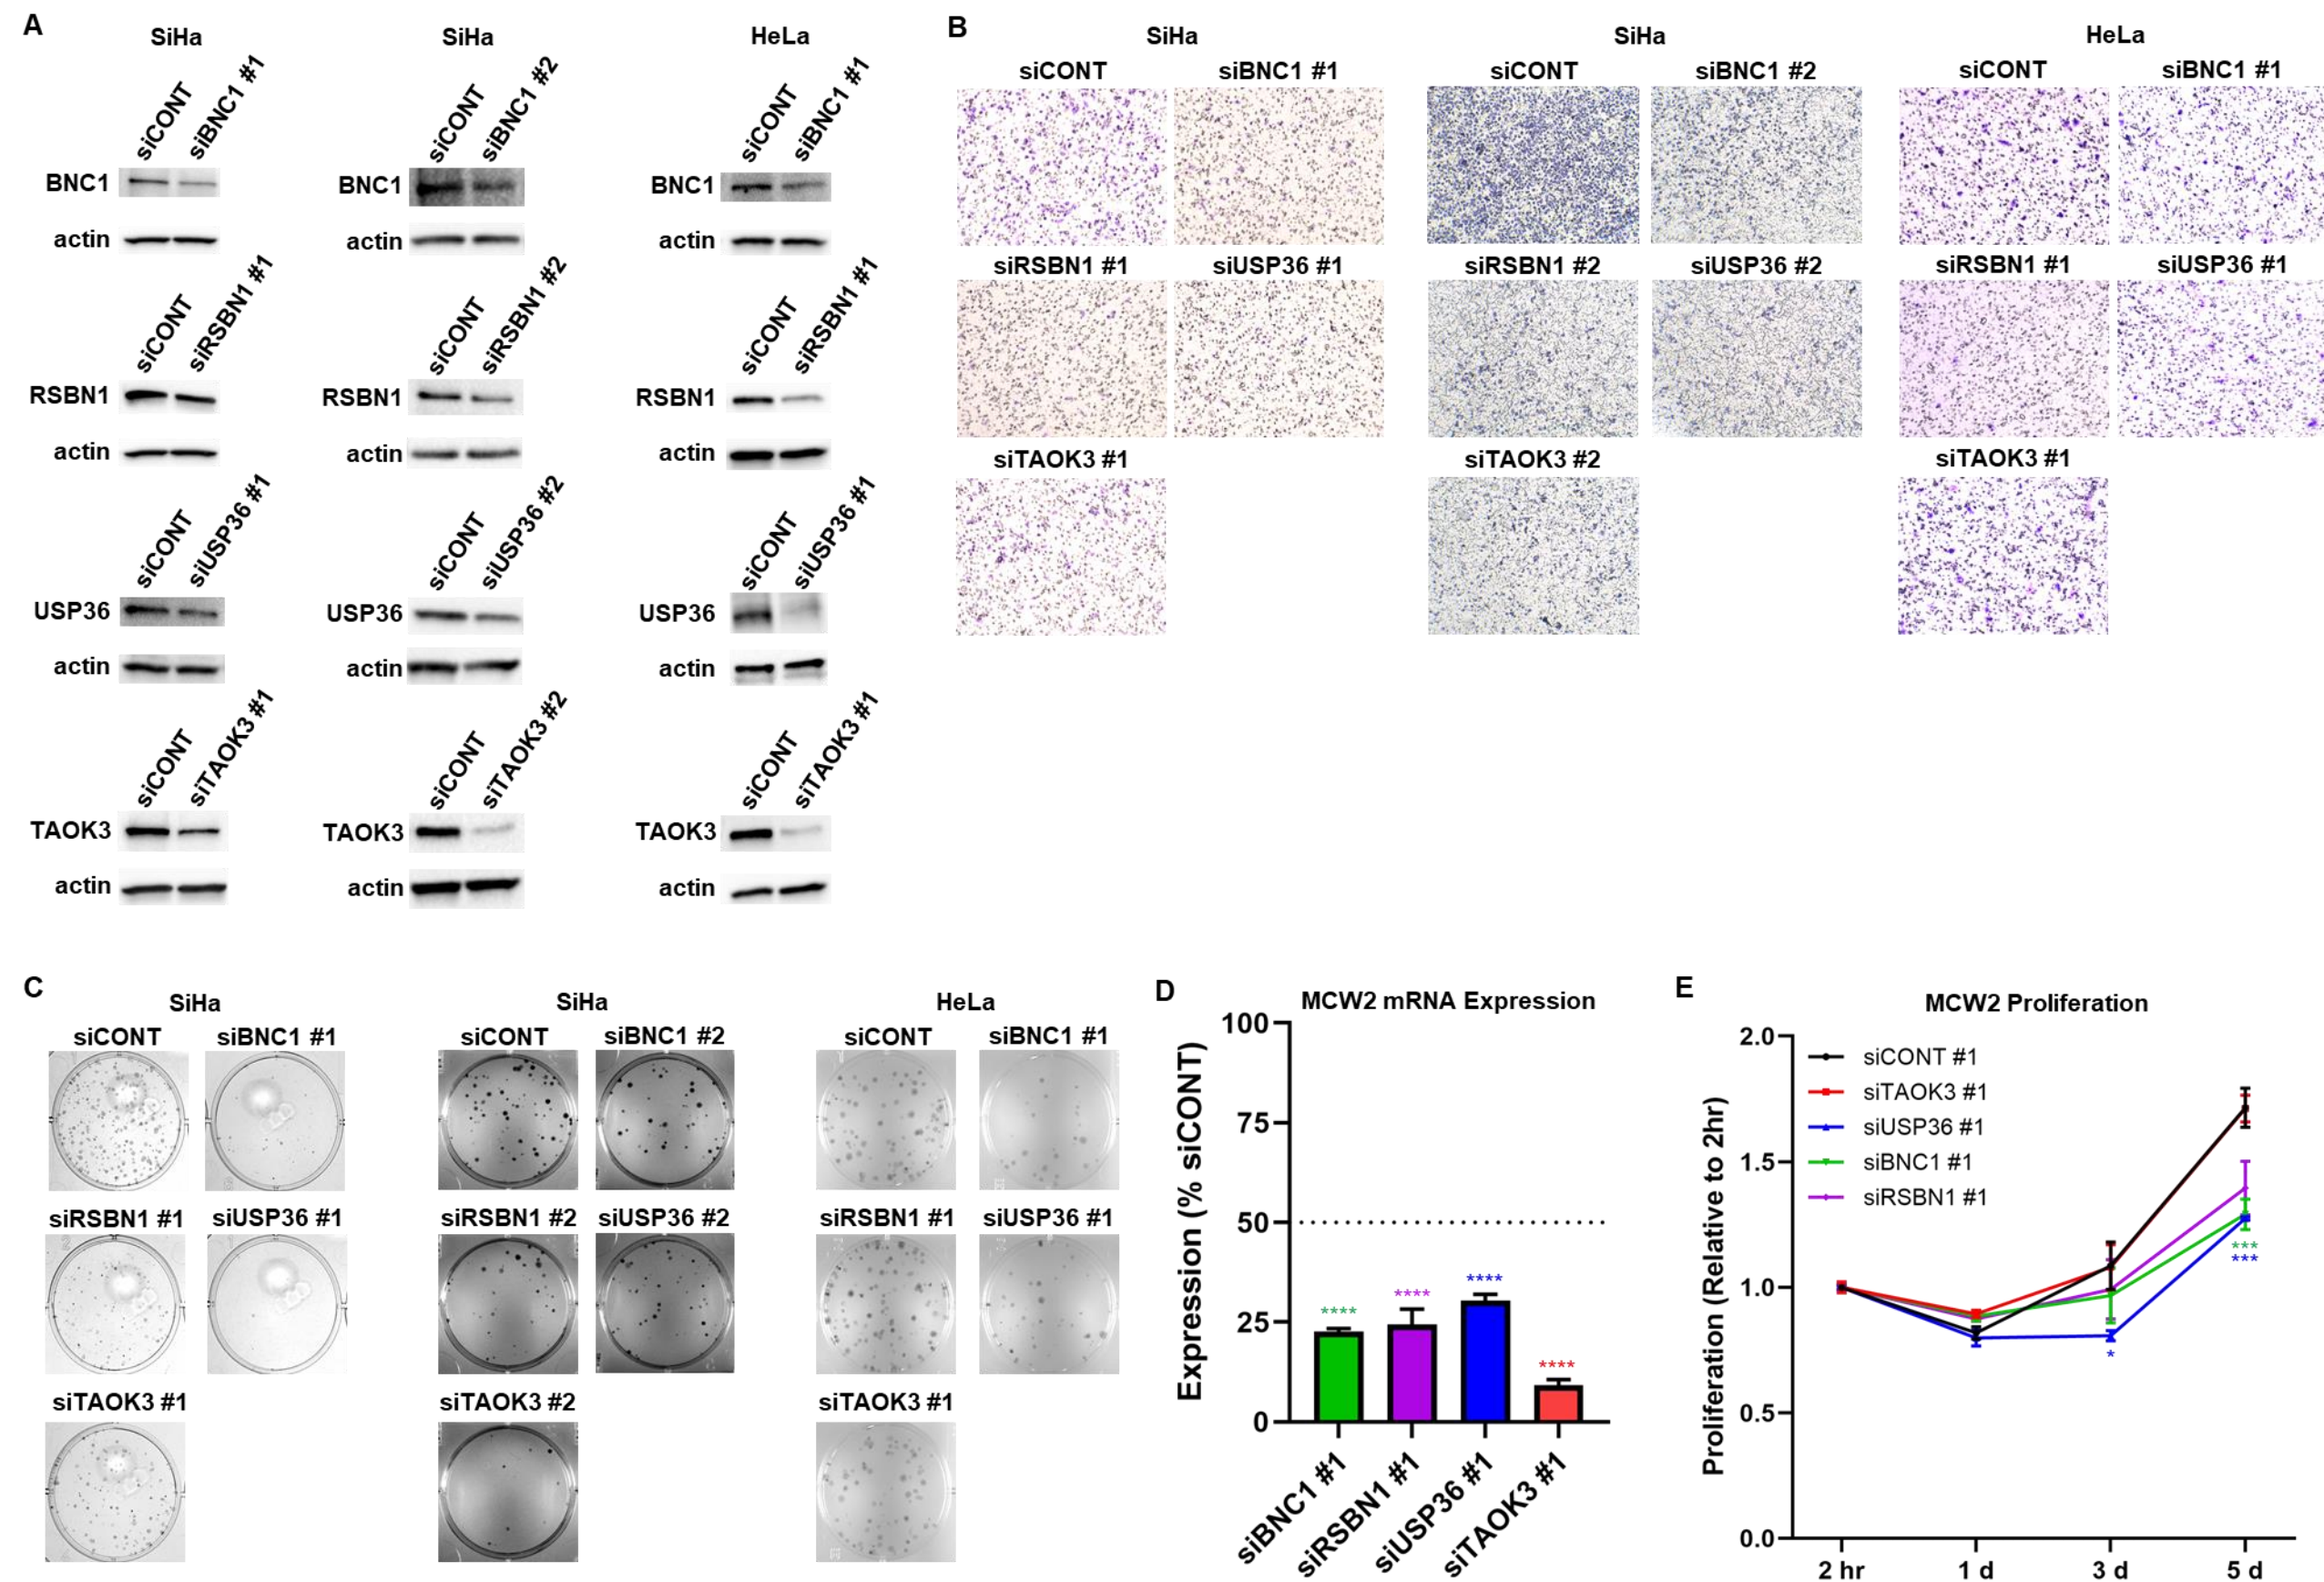

**Supplementary Figure S6. siRNA-mediated knockdown of candidate IDGs in 2 cervical cancer cell lines.** Representative western blot images (A) confirming decreased protein levels of candidate IDGs in SiHa (2 unique siRNA for each IDG; #1 and #2) and HeLa knockdown cells compared to control (siCONT). Representative images used to quantify SiHa and HeLa cell migration (B) and colony formation (C) presented in Fig. 6. IDG knockdown in the HPV18+ patient-derived cervical cancer cell line, MCW2 (D; \*\*\*\* $p < 0.0001$ ), revealed significantly decreased MCW2 proliferation upon knockdown of *USP36* and *BNC1* (E; \* $p < 0.05$ ; \*\*\* $p < 0.001$ ).

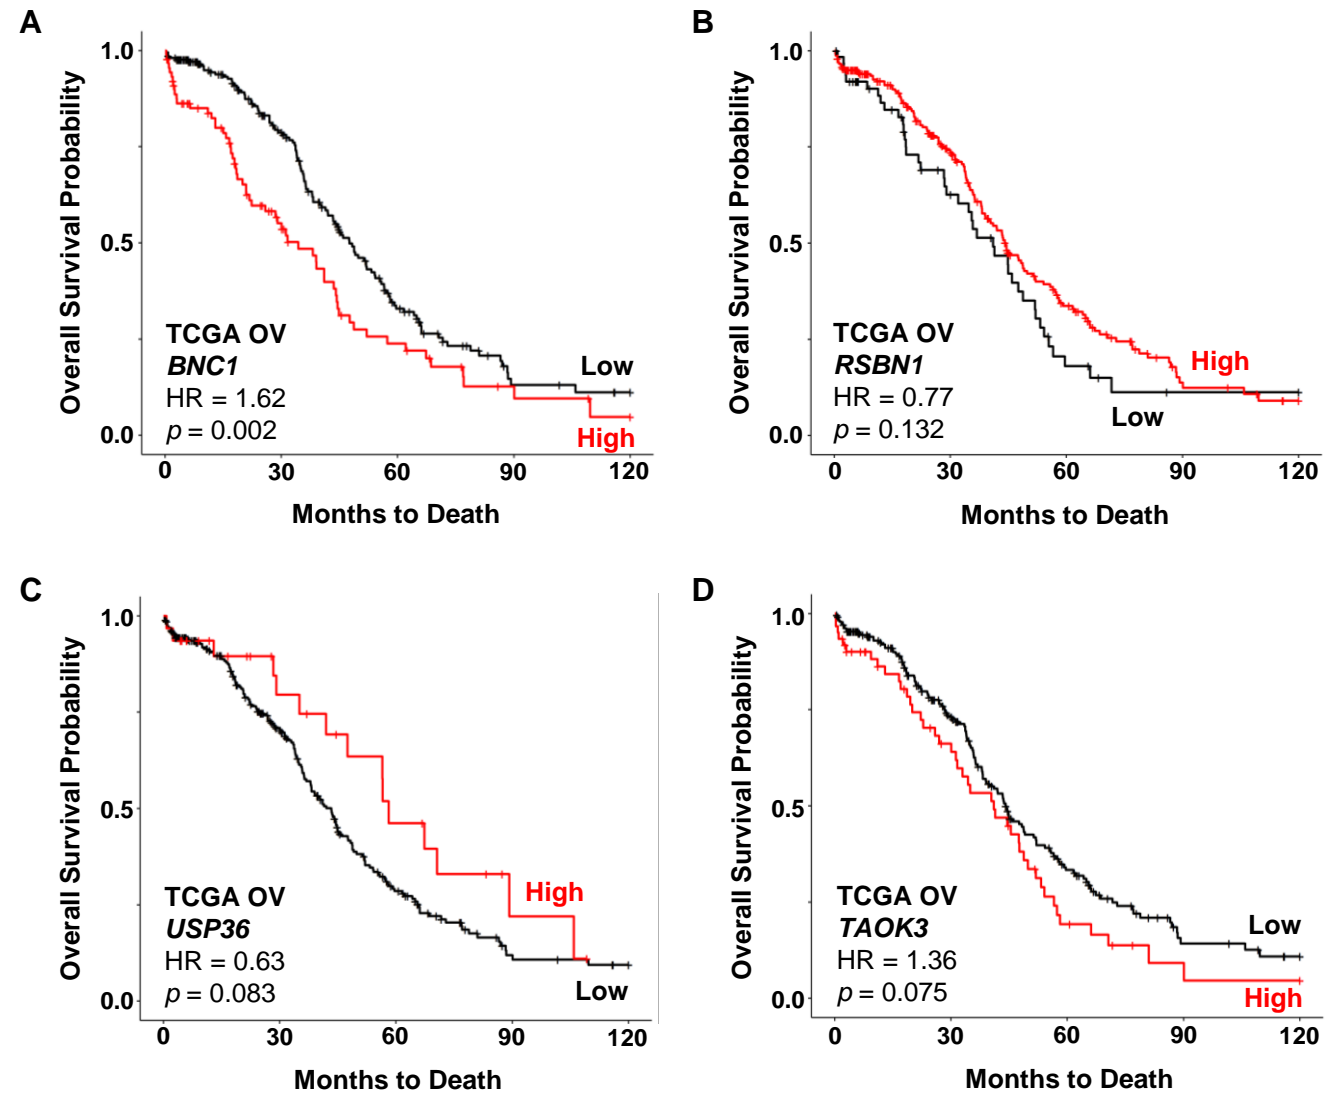

**Supplementary Figure S7. IDG expression correlation with overall survival in TCGA ovarian cancer cohort.** Kaplan-Meier plots were generated using RNAseq data from TCGA ovarian cancer cohort (TCGA OV; n=299). Similar to results from the TCGA ICC cohort, high expression of *BNC1* (A) and *TAOK3* (D; not significant) was associated with poorer overall survival in ovarian cancer patients. Conversely, low *RSBN1* (B) and *USP36* (C) expression demonstrated a trend toward associating with poorer overall survival in these patients. HR = Hazard ratio.

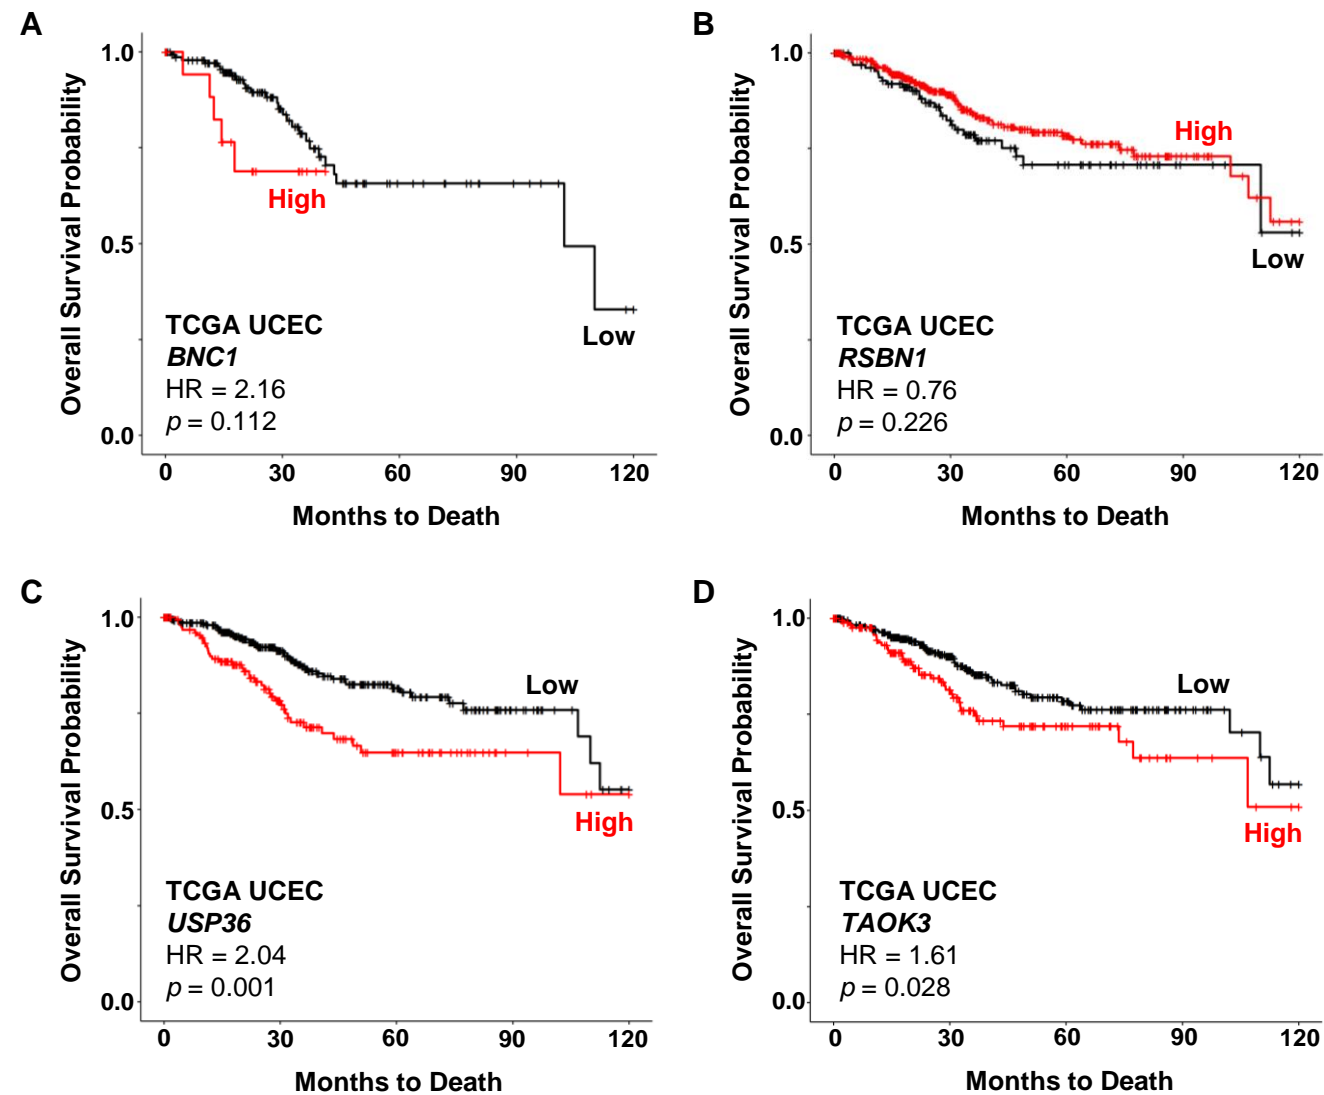

**Supplementary Figure S8. IDG expression correlation with overall survival in TCGA endometrial cancer cohort.** Kaplan-Meier plots were generated using RNAseq data from TCGA endometrial cancer cohort (TCGA UCEC). Similar to results from the TCGA ICC cohort, high expression of *BNC1* (A), *USP36* (C), and *TAOK3* (D) tended to associated with poorer overall survival in endometrial cancer patients, although the results did not reach significance. Conversely, low *RSBN1* (B) expression tended to predicted poorer overall survival of these patient, but also did not reach statistical significance. HR = Hazard ratio. *BNC1* survival analysis from the UCEC cohort was limited to n=172 samples (versus n=526 for *USP36*, *TAOK3*, and *RSBN1*) due to residual batch effects exhibited by some genes after normalization of TCGA pan-cancer RNAseq data.
